# Supplementary material for: System Analysis Based on Lipid-Metabolism-Related Genes Identifies AGT as a Novel Therapy Target for Gastric Cancer with Neoadjuvant Chemotherapy
Source: Pharmaceutics. 2023 Mar 2;15(3):810. doi: 10.3390/pharmaceutics15030810 (PMC10051152; doi:10.3390/pharmaceutics15030810)
Supplement: Supplementary file 1 [file pharmaceutics-15-00810-s001.zip › Supplementary Table.xls]

## Sheet: Lipid-Metabolism
Supplementary Table S1. The detailed lipid metabolism-related gene sets from the GSEA
Database	gene-set
GSEA	HALLMARK_FATTY_ACID_METABOLISM
	KEGG_FATTY_ACID_METABOLISM
	REACTOME_FATTY_ACID_METABOLISM
	REACTOME_METABOLISM_OF_LIPIDS
	REACTOME_REGULATION_OF_LIPID_METABOLISM_LISM_BY_PPARALPHA
	WP_LIPID_METABOLISM_PATHWAY
	HALLMARK_FATTY_ACID_METABOLISM

## Sheet: Univariate Cox regression
Supplementary Table S2. Univariate Cox regression results of the 95-lipid metabolism-related gene with Gastric cancer
Gene	HR	HR.95L	HR.95H	P value
ABHD4	0.8	0.65	0.99	0.039
ACACB	0.78	0.65	0.93	0.006
ACAT2	1.22	1.01	1.47	0.034
ADSL	1.45	1.11	1.89	0.006
AGMO	1.2	1.03	1.41	0.023
AGT	1.09	1.01	1.19	0.035
AKR1C3	1.12	1.02	1.22	0.013
ARSD	1.29	1.08	1.55	0.006
ARSG	0.66	0.44	0.98	0.041
ARSL	1.2	1.09	1.32	0
ASAH1	1.25	1.01	1.54	0.038
BDH2	1.4	1.13	1.73	0.002
BPHL	1.58	1.2	2.08	0.001
CEL	1.07	1.01	1.14	0.027
CIDEC	1.17	1.04	1.31	0.007
CRYZ	1.25	1.05	1.48	0.011
CSNK1G2	0.76	0.59	0.98	0.035
CYP21A2	0.26	0.09	0.76	0.014
DBI	1.37	1.13	1.65	0.001
DECR1	1.24	1.04	1.49	0.019
ELOVL6	1.24	1.05	1.46	0.01
ELOVL7	1.18	1.03	1.35	0.019
ENPP7	1.5	1.15	1.95	0.003
ESYT3	0.55	0.39	0.79	0.001
FABP1	1.05	1	1.11	0.047
FABP7	1.83	1.05	3.21	0.034
FASN	0.85	0.74	0.98	0.023
FDPS	1.26	1.03	1.54	0.027
GALC	1.2	1.03	1.39	0.016
GK	1.21	1.02	1.45	0.032
GPD2	1.23	1.02	1.47	0.027
GPS2	0.59	0.41	0.85	0.004
HADHB	1.46	1.04	2.05	0.029
HCCS	1.39	1.04	1.85	0.024
HILPDA	1.23	1.08	1.4	0.001
HTD2	0.09	0.01	0.83	0.034
INPP5E	0.68	0.53	0.89	0.005
INPPL1	0.68	0.54	0.86	0.001
LDHA	1.28	1.08	1.52	0.004
LTA4H	1.33	1.03	1.71	0.027
MCEE	1.35	1.02	1.8	0.034
MED12	0.74	0.58	0.95	0.016
MED16	0.74	0.58	0.93	0.01
MED22	0.58	0.44	0.77	0
MED25	0.79	0.64	0.98	0.03
MED6	1.56	1.09	2.22	0.015
METAP1	1.34	1.05	1.7	0.017
MIF	1.14	1.01	1.3	0.04
MIGA2	0.65	0.49	0.86	0.003
MOGAT1	1.32	1.01	1.73	0.043
MTMR12	0.78	0.63	0.98	0.032
NCOR2	0.69	0.56	0.85	0.001
NFYB	1.72	1.2	2.45	0.003
NR1H2	0.74	0.57	0.96	0.024
ORMDL2	1.26	1.01	1.56	0.038
OSTC	1.34	1.09	1.65	0.005
PI4KB	0.7	0.52	0.95	0.022
PIAS4	0.74	0.56	1	0.048
PIK3CD	0.85	0.72	1	0.048
PIP5K1C	0.67	0.54	0.85	0.001
PITPNM3	0.78	0.66	0.92	0.003
PLA2G2D	0.89	0.8	0.99	0.032
PLA2G4C	0.81	0.66	0.99	0.037
PLBD1	1.11	1	1.24	0.05
PLD2	0.78	0.61	0.99	0.043
PLIN2	1.17	1.03	1.33	0.019
PNPLA2	0.72	0.6	0.88	0.001
PON1	1.3	1	1.68	0.049
PPARD	0.76	0.61	0.96	0.023
PRKAR2B	0.88	0.78	1	0.047
PTDSS2	0.75	0.56	1	0.05
PTGES3	1.31	1.03	1.66	0.025
RDH11	1.41	1.11	1.79	0.005
REEP6	1.11	1.02	1.21	0.013
RUFY1	0.68	0.47	0.98	0.04
RXRA	0.72	0.57	0.92	0.007
S100A10	1.12	1	1.25	0.041
SBF1	0.79	0.65	0.97	0.021
SC5D	1.29	1.07	1.57	0.009
SIN3B	0.68	0.51	0.92	0.012
SLC25A20	1.25	1.01	1.55	0.044
SLC27A1	0.81	0.66	0.99	0.041
SLC27A3	0.77	0.61	0.97	0.027
SMS	1.25	1.01	1.54	0.042
SPTSSA	1.23	1.02	1.49	0.033
SREBF1	0.87	0.75	1	0.05
STARD3NL	1.41	1.08	1.83	0.01
SUCLG1	1.36	1.07	1.72	0.013
SULT2A1	1.22	1.08	1.37	0.002
TBL1X	0.84	0.72	0.98	0.028
TSPOAP1	0.79	0.63	0.99	0.038
UBE2I	1.44	1.06	1.96	0.021
UGDH	1.29	1.05	1.58	0.014
VDR	1.15	1.01	1.3	0.036
YWHAH	1.55	1.17	2.04	0.002

## Sheet: DEG-Chemotherapy
Supplementary Table S3. Differentially expressed genes of chemotherapy response and non-response groups in the TCGA-STAD cohort
Gene	logFC	AveExpr	t	P.Value	adj.P.Val	B
PGA5	2.30358	1.06462	3.51953	0.000598	0.02275	-0.41379
CKM	2.13103	1.02759	5.00635	1.78e-06	0.000335	4.63865
CCKAR	2.07457	0.870614	6.68065	6.4e-10	6.74e-07	12.2718
CYP2C8	1.68791	0.990939	5.10846	1.14e-06	0.000251	5.06635
PM20D1	1.60527	0.932226	8.27789	1.35e-13	4.68e-10	20.1037
NKX6-2	1.59803	1.04155	3.22874	0.001576	0.044281	-1.21987
KCNJ16	1.59061	0.878083	5.59241	1.28e-07	4.27e-05	7.29301
GKN1	-1.54615	3.9578	-2.31234	0.02234	0.217933	-3.30525
FRMD1	1.50408	0.902186	8.30262	1.18e-13	4.34e-10	20.3124
ESRRG	1.49415	0.916201	6.22792	6.13e-09	3.89e-06	10.1076
SIGLEC11	1.49014	0.853378	7.22231	3.92e-11	7.21e-08	14.9327
ENDOU	-1.48112	0.789365	-5.8091	4.62e-08	1.92e-05	8.24858
TFF2	-1.46256	5.98555	-2.33525	0.02107	0.210926	-3.26035
SERPINB13	-1.43716	0.715987	-5.35821	3.73e-07	0.000105	6.28749
CERS3	-1.41922	0.710811	-6.24403	5.67e-09	3.67e-06	10.22
MUC5AC	-1.4008	4.88262	-2.64331	0.009226	0.132586	-2.69388
AC018688.1	1.34358	0.945193	7.73117	2.63e-12	6.44e-09	17.3235
DSG1	-1.33216	0.759576	-5.91223	2.83e-08	1.31e-05	8.69008
ATP4A	1.3141	1.07295	3.008	0.003161	0.068376	-1.79243
MAB21L3	-1.28646	0.812273	-7.03649	1.03e-10	1.64e-07	14.0687
BPIFB1	-1.28581	4.47507	-2.36409	0.019564	0.202786	-3.21354
AC140658.7	1.27099	0.987619	6.69118	6.07e-10	6.5e-07	12.0655
GKN2	-1.26948	3.05157	-2.37949	0.018799	0.19811	-3.19331
CELA3A	1.23895	0.944587	8.4345	5.71e-14	2.4e-10	20.8812
BNC1	-1.23786	0.729726	-5.58886	1.3e-07	4.31e-05	7.22666
AL356867.1	-1.22544	0.65594	-5.30448	4.75e-07	0.000126	5.92536
TMEM211	1.22221	0.960634	7.44583	1.21e-11	2.45e-08	15.809
KRT6A	-1.20889	2.1475	-2.78222	0.006208	0.104061	-2.42333
ERVE-1	1.19529	0.988083	5.85506	3.72e-08	1.61e-05	8.30328
VSIG1	-1.18168	4.43566	-2.50674	0.013425	0.165484	-2.9564
SPRR1B	-1.17434	2.60702	-2.34744	0.020421	0.20716	-3.2493
EPGN	-1.16408	0.731655	-4.23453	4.31e-05	0.003597	1.67886
CYP17A1	1.16173	0.939724	7.87391	1.22e-12	3.27e-09	18.0474
SULT2A1	1.16082	1.075	3.73594	0.000279	0.013579	0.217057
MIR650	1.14871	1.14247	3.41233	0.00086	0.029491	-0.74377
MS4A10	-1.14123	0.777721	-5.88631	3.2e-08	1.43e-05	8.57426
SPRR3	-1.13466	2.0859	-2.29992	0.023056	0.221565	-3.32477
B3GAT1	1.12638	0.822146	4.91957	2.59e-06	0.000436	4.42844
RIMS4	1.12441	0.862696	6.48853	1.69e-09	1.4e-06	11.3677
KRT13	-1.12364	1.64477	-2.58271	0.010916	0.146821	-2.78848
TFF1	-1.12334	8.34275	-2.06104	0.041304	0.299726	-3.71719
MIR205HG	-1.11894	0.710478	-4.6349	8.61e-06	0.001101	3.37573
CAPNS2	-1.11135	0.742631	-5.07884	1.3e-06	0.000272	5.12831
KRT24	-1.10965	0.665727	-6.13826	9.51e-09	5.55e-06	9.6861
MUCL3	-1.09451	4.25676	-2.04141	0.043245	0.306834	-3.74507
SLC39A2	-1.08279	0.741994	-6.07087	1.32e-08	7.2e-06	9.41296
LY6D	-1.08015	2.3615	-2.71132	0.007613	0.117952	-2.57798
RP11-554A11.9	1.07221	1.03701	4.14865	6.02e-05	0.004638	1.56689
IGHA2	-1.06912	8.14723	-2.43852	0.016105	0.182745	-3.07288
ANXA10	-1.05528	4.76971	-2.11515	0.036336	0.280208	-3.6301
FAT2	-1.05422	0.759189	-5.48634	2.08e-07	6.38e-05	6.83502
FP236383.7	1.05114	1.08194	2.96559	0.003599	0.074324	-1.89713
ENPP7	-1.04086	0.793346	-5.05114	1.46e-06	0.000295	4.94153
B4GALNT2	1.03989	0.783079	5.56524	1.45e-07	4.68e-05	7.13146
LYPD2	-1.03986	2.93438	-2.27643	0.024464	0.228283	-3.36991
AC026333.1	1.03958	0.92459	7.99752	6.24e-13	1.75e-09	18.7193
FAM83C	-1.03638	0.747457	-4.73582	5.65e-06	0.000803	3.76695
COL10A1	1.02748	3.80364	3.01881	0.003058	0.066888	-1.9421
IGHV3OR16-15	1.02704	1.05565	3.50071	0.000637	0.023597	-0.46874
ALKAL2	1.02339	0.94398	4.12693	6.54e-05	0.004933	1.54215
IGHA1	-1.02064	10.6105	-2.3131	0.022296	0.217793	-3.29785
FOXN1	-1.01196	0.797799	-5.64678	9.91e-08	3.5e-05	7.53214
RNU1-21P	-1.00411	0.89703	-2.51855	0.013004	0.16337	-3.23518
HCG22	-0.99137	0.70178	-4.29778	3.37e-05	0.003029	1.82905
SFRP2	0.983353	5.83504	2.15666	0.032882	0.265956	-3.56321
CWH43	-0.97487	0.721703	-3.7729	0.000245	0.012368	0.028095
TEX101	0.969529	1.00591	4.59679	1.01e-05	0.001235	3.19368
SPRR2D	-0.96513	1.36183	-3.05907	0.0027	0.062076	-1.71398
NRG4	0.96482	1.07083	3.72581	0.00029	0.013965	0.189142
FGG	0.961472	0.940993	3.45466	0.000746	0.026464	-0.58952
SFRP4	0.961344	4.74966	2.35358	0.020101	0.205475	-3.23198
GAST	-0.95857	1.94375	-2.30352	0.022846	0.22031	-3.31823
H2BP1	0.942261	0.840361	7.11176	6.98e-11	1.18e-07	14.4036
PPP1R1B	0.936936	5.2137	2.33803	0.020921	0.209911	-3.25765
FOXE1	-0.93124	0.714328	-5.30062	4.84e-07	0.000127	5.93377
AQP10	-0.92589	0.744151	-4.65161	8.03e-06	0.001045	3.26763
SPAG17	-0.91199	0.782184	-6.07536	1.29e-08	7.11e-06	9.44702
SPRR2A	-0.90869	1.72762	-2.20249	0.029404	0.251124	-3.4872
MIR4648	0.90085	1.01652	5.12458	1.06e-06	0.000237	5.08948
MTND1P23	-0.89509	7.22182	-2.19453	0.029984	0.253264	-3.5006
CA2	-0.89424	6.43844	-2.23024	0.027456	0.242503	-3.44083
IL36G	-0.89352	0.734631	-5.51089	1.86e-07	5.86e-05	6.93963
TUSC8	0.893501	0.90837	5.43599	2.62e-07	7.76e-05	6.59503
DSG3	-0.88768	2.19217	-2.51622	0.013086	0.163806	-2.94661
IRAIN	0.879179	0.73967	4.20002	4.94e-05	0.003996	1.47407
FP236383.12	0.877901	3.9217	2.06909	0.04053	0.297286	-3.70206
GJB6	-0.87295	1.32123	-4.00113	0.000106	0.006839	0.828128
SLC6A4	-0.86962	0.821687	-8.70583	1.27e-14	8.31e-11	22.6908
NTS	-0.86653	1.50617	-3.494	0.000652	0.024006	-0.70664
FP236383.2	0.86256	1.72426	2.86482	0.004871	0.090059	-2.20188
TMPRSS11B	-0.85968	0.753854	-3.22288	0.001606	0.044795	-1.28392
IGHV4-39	-0.85507	7.01555	-2.1244	0.035541	0.276568	-3.61583
DKK1	-0.85051	2.89461	-2.09991	0.03768	0.285375	-3.65452
AC019181.2	0.849987	0.992768	6.21566	6.51e-09	4.08e-06	9.84398
GPR150	0.84139	0.90906	6.60156	9.55e-10	9.4e-07	11.8198
A2ML1	-0.84127	1.12141	-3.19516	0.001756	0.047292	-1.32988
KRT4	-0.82915	1.52591	-2.00589	0.046955	0.321347	-3.81068
JCHAIN	-0.82077	7.83458	-2.09841	0.037815	0.285917	-3.65778
UPK1B	-0.82069	1.83832	-3.06422	0.002657	0.061581	-1.8139
FP671120.6	0.818555	3.60228	2.36566	0.019484	0.202218	-3.21618
KRT5	-0.81629	1.53237	-2.31394	0.022249	0.217672	-3.29292
IGHV3-20	-0.81472	3.54973	-2.38226	0.018664	0.197395	-3.18625
ALDH3A1	-0.81448	3.79074	-2.39021	0.018282	0.19516	-3.17093
GPR87	-0.8135	1.00738	-3.80032	0.000222	0.011526	0.377643
ADGRG2	0.812215	1.02525	4.78978	4.5e-06	0.000667	3.83505
COL11A1	0.811496	2.33867	2.95933	0.003668	0.075014	-2.07253
CSTA	-0.807	3.23452	-2.82936	0.005409	0.095934	-2.34362
IGHV3OR16-12	0.804152	0.960153	4.49191	1.55e-05	0.001692	2.80541
C11orf86	-0.80284	2.24897	-2.6876	0.008144	0.123102	-2.62613
OTOP3	-0.80109	1.16513	-3.7995	0.000222	0.01154	0.321262
LINC00473	-0.8002	0.849306	-3.48705	0.000668	0.024366	-0.68669
SULF1	0.797082	5.44507	3.05873	0.002703	0.062076	-1.82617
APOA2	-0.79566	1.29028	-2.91623	0.004178	0.081405	-2.03642
ACER1	-0.79539	0.723054	-4.80098	4.29e-06	0.000647	3.80377
IL36A	-0.79178	0.767749	-3.20351	0.00171	0.046464	-1.33137
AC116407.1	0.790125	0.859059	6.02369	1.66e-08	8.64e-06	9.21692
IGKV1OR10-1	0.789776	1.01636	4.12385	6.62e-05	0.004966	1.48139
SCEL	-0.78785	1.79162	-2.67783	0.008372	0.124999	-2.62203
CRCT1	-0.78556	1.08844	-2.7171	0.007488	0.116483	-2.48131
SERPINB3	-0.78379	1.47833	-2.46243	0.015116	0.177157	-3.01721
IGLV2-8	-0.78261	5.17839	-2.17092	0.031764	0.260982	-3.54002
IGLV2-23	-0.78133	6.75657	-2.0842	0.03911	0.291672	-3.6802
CLCA4	-0.78094	1.10683	-2.71118	0.007616	0.117967	-2.49284
H3P4	0.780207	0.858682	6.05354	1.43e-08	7.62e-06	9.35119
ARSL	0.77869	3.86761	3.1169	0.002253	0.055174	-1.72587
AC092569.1	0.776982	1.08017	3.64105	0.000392	0.017259	-0.0645
AC018714.1	0.776268	0.789939	4.18651	5.2e-05	0.004154	1.56062
IGLV7-46	-0.77519	4.71773	-2.04542	0.042842	0.305658	-3.73938
LGR6	0.773483	2.39669	2.98882	0.003353	0.071186	-2.01492
LINC02768	-0.76977	0.879239	-7.40974	1.46e-11	2.78e-08	15.7225
CELA3B	0.769108	0.867125	5.20721	7.35e-07	0.000178	5.65088
GYG2P1	0.767781	1.01429	4.1753	5.43e-05	0.004274	1.68694
KRT6C	-0.76699	1.04582	-2.61662	0.009938	0.13856	-2.70904
TAAR1	-0.76464	0.826617	-4.58116	1.07e-05	0.001298	3.17067
GAS1	0.756006	3.29745	2.80642	0.005785	0.10002	-2.39236
MIR3651	0.754362	0.993685	6.95509	1.57e-10	2.15e-07	13.1807
COL17A1	-0.753	3.64248	-2.48021	0.014416	0.172136	-3.01089
SOSTDC1	-0.75092	1.95479	-2.89484	0.004455	0.085024	-2.1938
KCNJ13	0.748512	1.00059	5.485	2.09e-07	6.38e-05	6.67719
SLURP1	-0.74789	1.05363	-2.84704	0.005134	0.09297	-2.18315
EFNA2	0.746235	3.64915	2.61985	0.00985	0.137857	-2.75297
RHCG	-0.74573	1.69974	-2.10396	0.037319	0.284177	-3.64892
IGKV1OR2-9	0.744902	0.942241	4.46383	1.73e-05	0.001842	2.73318
AC135068.8	0.74309	0.949806	3.35696	0.001035	0.03339	-0.87107
DYNAP	-0.74146	0.618148	-3.93217	0.000137	0.008056	0.420238
AKR1C2	-0.74118	2.05279	-2.97582	0.003489	0.072814	-2.03027
MTND4P24	-0.73963	5.05404	-2.5175	0.013041	0.163602	-2.93291
SOX21	-0.73933	1.91941	-2.65497	0.008929	0.129905	-2.67612
TMPRSS11A	-0.73565	0.752029	-3.33463	0.001115	0.035026	-0.95104
KRT14	-0.73525	1.4547	-2.26132	0.02541	0.232592	-3.38661
FER1L6	-0.73366	2.5742	-2.15254	0.033213	0.267315	-3.57227
AL032819.2	0.73139	0.91218	3.15209	0.002015	0.051618	-1.4731
THBS2	0.729089	5.29251	2.5111	0.013268	0.164742	-2.94466
PLAAT2	-0.72889	3.25424	-2.31313	0.022295	0.217793	-3.30711
CXCL14	-0.72854	6.19462	-2.05358	0.042033	0.302444	-3.72815
AC004819.1	0.726266	0.950038	7.41435	1.42e-11	2.78e-08	15.7155
KRT16P6	-0.72431	0.644638	-5.90662	2.91e-08	1.33e-05	8.56493
TMPRSS15	-0.72009	1.07159	-2.955	0.003717	0.075786	-1.9236
AL357075.1	-0.71855	0.855299	-8.80892	7.16e-15	5.28e-11	23.1344
FNDC1	0.716803	3.88547	2.32518	0.02162	0.214163	-3.28459
CPA4	-0.71669	0.801297	-3.97076	0.000118	0.007351	0.794862
SERPINB4	-0.71478	1.19349	-2.8513	0.00507	0.092246	-2.17577
AC093809.1	-0.71216	4.40685	-2.9739	0.003509	0.073055	-2.02302
IGKV7-3	0.70993	1.0064	4.39415	2.3e-05	0.002255	2.43451
KLK13	-0.70853	1.85303	-2.31873	0.021979	0.216191	-3.29212
IGHV2-5	-0.70751	3.73343	-2.00824	0.046701	0.320317	-3.79474
INSL4	-0.70637	0.850716	-6.01492	1.73e-08	8.94e-06	9.181
WFDC5	-0.70309	0.694261	-5.7808	5.28e-08	2.12e-05	8.0037
AL512328.1	0.702914	1.0032	3.48791	0.000666	0.024342	-0.48938
IGHV1OR16-3	0.702702	1.04377	3.99901	0.000106	0.006872	1.06718
AL355312.4	-0.70265	3.26507	-2.49064	0.014019	0.169422	-2.99496
IGHD4-4	-0.70201	0.963284	-4.53247	1.31e-05	0.001505	2.8491
RNU6-964P	0.70096	0.927558	8.83099	6.33e-15	5.28e-11	22.9745
SNORA80A	0.699157	0.922629	5.94064	2.47e-08	1.19e-05	8.80778
RNU7-186P	-0.69618	0.803515	-4.33677	2.89e-05	0.002703	2.11864
MUC22	-0.69137	0.615636	-4.44042	1.91e-05	0.001974	2.26735
DSC3	-0.6904	1.24679	-3.33018	0.001131	0.035302	-1.00803
PLCXD3	0.68998	0.834822	4.82835	3.82e-06	0.000596	4.09168
RGS7	0.68801	1.00686	4.71282	6.22e-06	0.000853	3.62042
DRAIC	0.683478	0.964154	3.32826	0.001139	0.035432	-0.94631
RARRES1	0.68009	5.02095	2.3831	0.018623	0.197094	-3.17874
SPOCK1	0.679876	3.25802	2.5471	0.012034	0.155543	-2.89329
SLC6A14	-0.67772	3.98377	-2.03464	0.043932	0.309685	-3.7551
COL1A1	0.676043	9.47266	2.64168	0.009268	0.132884	-2.686
SPRR2C	-0.672	0.803533	-2.57322	0.011204	0.14893	-2.87719
SPP1	0.671859	5.87103	2.08675	0.038876	0.290548	-3.67559
H3-2	0.671072	0.996886	5.59312	1.27e-07	4.27e-05	7.13417
MAL	-0.67057	2.25173	-2.00143	0.04744	0.322942	-3.80403
MIR4530	0.668842	1.02448	3.24294	0.001505	0.042968	-1.17963
AMPD1	0.668329	1.04754	3.60095	0.000451	0.019011	-0.17013
HBA2	-0.66797	4.33977	-2.47047	0.014796	0.174991	-3.02387
SLC25A30-AS1	0.664423	0.949481	8.92976	3.65e-15	3.58e-11	23.3813
AP003721.4	0.660403	0.926235	6.14445	9.22e-09	5.44e-06	9.68707
MIR4692	0.656773	0.762118	6.65377	7.34e-10	7.59e-07	12.1892
AC022384.2	0.654492	0.937985	4.40082	2.23e-05	0.002215	2.51301
RNASE7	-0.64976	0.801509	-3.43014	0.00081	0.028194	-0.70401
RNF225	-0.64247	0.860051	-3.96255	0.000122	0.007495	0.99265
TTR	-0.64005	1.77302	-2.20426	0.029276	0.250542	-3.48496
KCNK15	0.636274	2.74718	2.30057	0.023017	0.221418	-3.33098
MIR4714	0.636251	0.743821	3.72182	0.000294	0.01412	-0.1385
AC129492.2	0.633771	0.807529	6.52743	1.39e-09	1.24e-06	11.5807
MIR3116-1	0.631673	0.915302	8.12093	3.19e-13	9.39e-10	19.3236
AL132988.1	-0.63002	4.70021	-2.52098	0.012919	0.162939	-2.92851
PDILT	0.629841	0.664816	3.52052	0.000595	0.022731	-1.08532
POPDC3	0.628109	1.07586	3.12881	0.00217	0.054044	-1.48406
SCARNA1	0.626037	0.955128	9.62182	7.41e-17	2.18e-12	27.047
KRT78	-0.626	0.849246	-2.34931	0.020324	0.206595	-3.37691
AGT	-0.62372	5.09969	-2.19464	0.029975	0.253264	-3.50108
TRAJ44	0.623639	0.957295	4.55511	1.2e-05	0.001403	3.07821
TMPRSS11E	-0.62323	0.885907	-2.35877	0.019834	0.204165	-3.29851
IGHV3-76	0.622548	1.07346	3.07113	0.0026	0.060807	-1.63216
CALML3	-0.62197	0.896858	-2.53258	0.012519	0.159637	-2.93419
AC005041.2	0.621903	1.0309	4.33546	2.9e-05	0.002705	2.20252
IGLV3-29	0.620409	0.900408	2.94729	0.003805	0.076793	-2.07067
TRAJ28	0.620079	0.902792	4.59419	1.02e-05	0.001243	3.22676
AP004608.1	0.619548	0.96185	6.06212	1.38e-08	7.43e-06	9.19905
IL1RN	-0.6194	5.08695	-2.069	0.040539	0.297286	-3.70309
FP236383.8	0.613936	0.905415	2.79878	0.005916	0.101208	-2.54349
NKX2-8	-0.61322	0.879038	-3.27469	0.001358	0.039969	-1.27251
TRIM50	0.612767	0.728944	3.23949	0.001522	0.043254	-1.81669
F3	-0.6124	5.42215	-2.92825	0.00403	0.079674	-2.10761
MTND4P12	-0.61159	6.46334	-2.81631	0.00562	0.098176	-2.33582
CCDC154	0.609231	0.910054	4.03415	9.32e-05	0.006316	1.22719
SLAMF6P1	-0.60813	0.813261	-4.29267	3.43e-05	0.003067	1.97275
CEMIP	0.606641	3.67042	2.22371	0.027904	0.244591	-3.45581
LINC02404	-0.60629	1.3341	-2.73499	0.007115	0.113065	-2.45447
USH1G	-0.60607	0.702057	-4.43544	1.94e-05	0.002007	2.32972
IDH2-DT	0.605842	0.942152	8.2571	1.51e-13	4.96e-10	19.937
MTCO1P40	-0.60419	6.21757	-2.94544	0.003826	0.076906	-2.06396
PTCHD1	-0.60325	0.878516	-2.88925	0.00453	0.085762	-2.34886
LGALS9B	-0.60311	1.71182	-2.63511	0.00944	0.134222	-2.7006
GPR1	-0.60216	0.966847	-3.83223	0.000197	0.010523	0.54087
IGHV3-63	0.599552	0.866758	4.92766	2.5e-06	0.000424	4.51046
LINC02560	-0.59955	1.07329	-4.04213	9.04e-05	0.006226	1.133
CST6	-0.59875	1.86638	-2.15133	0.033309	0.267714	-3.5723
PLIN5	0.598587	1.05129	3.32404	0.001155	0.035739	-0.95812
SLC1A2	0.59758	0.867746	4.31173	3.19e-05	0.002916	2.13725
MPPED2	-0.59675	0.858912	-5.4376	2.6e-07	7.74e-05	6.62236
PLA2G1B	0.596318	1.03446	3.81838	0.000207	0.010958	0.505411
CPA2	0.593694	1.26387	2.57593	0.011121	0.14826	-2.7841
PURPL	-0.59335	1.17859	-3.28325	0.00132	0.039184	-1.10396
VSIG8	-0.5912	0.888988	-4.30994	3.21e-05	0.00293	2.17516
LINC00278	0.590733	1.03211	3.41062	0.000865	0.029565	-0.71196
RNU1-47P	-0.59006	0.905224	-5.17347	8.54e-07	0.000202	5.51581
PKP1	-0.59006	1.5592	-2.00929	0.046589	0.319882	-3.80169
GRIP2	0.588906	0.876479	6.60109	9.57e-10	9.4e-07	11.8855
SPINK5	-0.5871	2.84213	-2.06353	0.041064	0.298766	-3.71052
AL365502.1	0.586572	0.933169	7.1203	6.67e-11	1.16e-07	14.3008
AL137022.1	-0.58626	1.64705	-2.60715	0.010203	0.140967	-2.7529
SERPIND1	0.584866	1.00455	5.48997	2.05e-07	6.33e-05	6.65785
TRPA1	-0.5825	2.0107	-2.69632	0.007945	0.121215	-2.60445
IGHV1-68	0.581645	0.904356	5.34763	3.91e-07	0.000109	6.24125
MIR3648-2	0.580724	0.930631	5.91049	2.85e-08	1.31e-05	8.66518
IGHD6-13	0.579894	0.979613	2.56165	0.011565	0.151939	-2.87663
MIR4659A	0.579287	0.971942	4.96814	2.1e-06	0.000373	4.58162
DMRTA2	-0.57891	0.964736	-3.94591	0.00013	0.007831	0.905675
SMILR	-0.57874	0.75675	-4.03757	9.2e-05	0.00629	0.949069
MMP10	-0.57818	2.21274	-2.35024	0.020275	0.206329	-3.24532
SPINK2	0.577555	0.941936	4.52338	1.36e-05	0.001546	2.95193
MIR4296	0.5773	1.00357	7.20314	4.33e-11	7.73e-08	14.3558
MIR6793	0.576936	0.979295	5.98125	2.03e-08	1.02e-05	8.89857
TMPRSS11D	-0.57442	0.802303	-2.76643	0.006499	0.106838	-2.44234
TMEM132D-AS1	-0.57438	0.917681	-3.22673	0.001587	0.044468	-1.22486
RNU6-171P	0.57372	0.914225	5.17838	8.35e-07	0.000198	5.5358
AC093583.1	0.572831	0.791288	3.99329	0.000109	0.006986	0.846977
CLCA2	-0.57275	0.938718	-2.15077	0.033355	0.2679	-3.69685
ISLR	0.572682	5.81407	2.05427	0.041965	0.302143	-3.72661
AC108863.1	-0.57249	0.808579	-4.46487	1.73e-05	0.001837	2.6129
CD24P4	-0.57219	3.83171	-2.417	0.017045	0.188042	-3.12341
CCER2	-0.57119	0.895148	-4.59442	1.02e-05	0.001243	3.22056
MIR5572	-0.57092	1.1544	-3.2842	0.001316	0.039155	-1.09279
LRRC15	0.568984	2.2823	2.55079	0.011914	0.154731	-2.88652
ISM1	0.568674	2.28704	2.48535	0.014219	0.170473	-3.00641
AC103563.2	-0.56535	0.618685	-3.02607	0.00299	0.066059	-2.55919
COL1A2	0.563937	8.32525	2.43042	0.016454	0.185068	-3.0877
SAMD9	-0.56092	4.52836	-2.65847	0.008842	0.129079	-2.66767
RNU6-1003P	0.560459	0.78047	8.12936	3.04e-13	9.39e-10	19.6971
IGHV3-65	0.559665	0.957912	3.4434	0.000775	0.027274	-0.62267
MIR6895	-0.55916	0.895418	-4.82895	3.81e-06	0.000596	4.09989
CT978678.1	0.558902	0.749933	6.48325	1.73e-09	1.42e-06	11.3326
AC125616.1	0.557899	0.807271	6.29794	4.35e-09	2.91e-06	10.4923
TMPRSS11F	-0.55788	0.597489	-3.77016	0.000247	0.012451	-0.2037
ADAM28	-0.55373	3.34016	-2.52488	0.012783	0.161919	-2.93193
AC011676.3	0.552237	0.971601	8.40396	6.75e-14	2.65e-10	20.5262
MIR6776	0.550772	0.800965	5.5463	1.58e-07	5.06e-05	7.04884
CFAP46	0.550436	1.00205	3.92319	0.000141	0.008255	0.852013
AC124067.4	0.548779	2.2518	2.27864	0.024329	0.227627	-3.36609
TRBV10-2	0.548219	1.03598	4.03483	9.29e-05	0.006316	1.19029
C6orf15	-0.54738	1.07135	-2.35102	0.020234	0.206198	-3.27037
GSDMC	-0.54581	1.10077	-3.86294	0.000176	0.009721	0.559008
IGSF11	-0.54542	0.832902	-4.67726	7.22e-06	0.000959	3.47089
AC091182.2	-0.54483	0.850678	-5.16838	8.73e-07	0.000205	5.49448
RP11-680G10.1	0.544273	0.883477	5.78613	5.15e-08	2.09e-05	8.14044
AC009093.3	0.543826	1.06454	3.31289	0.001198	0.036731	-0.99093
AGMAT	0.540987	4.52831	2.83083	0.005386	0.095783	-2.32411
TGM1	-0.54087	1.37917	-2.48371	0.014282	0.171084	-2.97315
IGKV1OR22-1	0.538738	1.05375	2.97162	0.003534	0.073332	-1.88597
CPXM1	0.53817	3.83292	2.49112	0.014001	0.169422	-2.99089
FP671120.3	0.538082	1.17789	2.61646	0.009943	0.13856	-2.73107
KRTDAP	-0.53756	0.830464	-2.77436	0.006351	0.105416	-2.48792
AL355102.1	-0.53717	0.881478	-6.91582	1.92e-10	2.58e-07	13.3962
ART3	-0.5371	0.848046	-4.54564	1.24e-05	0.001445	3.00708
ZG16	-0.53408	0.949507	-4.03542	9.27e-05	0.006315	1.19652
ZNF365	-0.53338	0.806199	-4.12121	6.69e-05	0.005004	1.33645
TP63	-0.53317	1.07613	-3.21971	0.001623	0.045054	-1.25433
IGFL1	-0.53293	0.94622	-2.64657	0.009142	0.131861	-2.68602
SBSN	-0.53287	0.985465	-2.03482	0.043914	0.309625	-3.90539
COL3A1	0.532315	9.20948	2.22151	0.028056	0.24523	-3.45528
DHRS9	-0.53064	2.02679	-2.02643	0.044778	0.313101	-3.76705
ANXA8	-0.53004	0.96367	-2.97507	0.003497	0.072877	-1.8838
GBP6	-0.52988	1.15373	-2.19769	0.029752	0.252561	-3.54281
RN7SL838P	0.526984	0.948924	7.72425	2.73e-12	6.44e-09	17.1466
AC087071.1	-0.52635	0.832706	-8.68716	1.41e-14	8.31e-11	22.5623
CTHRC1	0.525777	5.30177	2.15547	0.032978	0.26656	-3.56523
AC019117.3	0.525547	0.86579	5.92183	2.7e-08	1.27e-05	8.75184
AC000029.1	-0.52513	0.922911	-5.01701	1.7e-06	0.000324	4.86217
SPATA13-AS1	0.524846	0.857311	8.63648	1.87e-14	1e-10	22.1607
EMB	-0.52423	4.68479	-2.8439	0.005182	0.093405	-2.29332
MIR5189	0.524043	0.867943	6.15147	8.91e-09	5.31e-06	9.79468
AL121974.1	0.522871	0.776717	2.37778	0.018882	0.198412	-3.89823
BMP5	0.522641	0.932826	2.33926	0.020855	0.209537	-3.41485
RNU6-101P	0.522446	0.949013	4.8371	3.68e-06	0.000583	4.10575
PLA2G4E	-0.52243	0.818445	-3.18417	0.001819	0.048298	-1.60625
AC074289.2	0.522314	0.995216	4.11638	6.81e-05	0.005084	1.50921
CEACAM1	-0.52222	5.08633	-2.42864	0.016531	0.185513	-3.09621
CCL26	0.521998	2.06168	2.0991	0.037753	0.285596	-3.65541
C6orf223	0.521431	2.42337	2.03775	0.043616	0.308339	-3.74957
MTND2P13	-0.51973	1.1845	-2.34379	0.020614	0.208255	-3.25963
HEPHL1	-0.51969	0.846802	-5.07086	1.34e-06	0.000279	5.09593
MLN	-0.51927	1.26246	-2.0765	0.039828	0.294494	-3.724
SYTL5	-0.51923	1.6559	-2.75289	0.006758	0.109629	-2.46248
MIR587	0.518671	0.853818	4.26067	3.9e-05	0.003361	1.93119
COL2A1	0.518596	0.818534	2.54255	0.012184	0.156622	-3.3826
MYO18B	0.516152	0.756275	3.56308	0.000514	0.020789	-0.71587
KRT16P2	-0.51578	0.740407	-3.90799	0.000149	0.00863	0.515462
CATIP-AS1	0.515079	0.868475	6.82306	3.1e-10	3.58e-07	12.9624
IL36RN	-0.51435	0.633718	-3.94169	0.000132	0.007881	0.415918
S100G	-0.51363	1.09324	-3.86334	0.000176	0.009716	0.58095
RNU6-107P	0.513293	1.01419	4.86361	3.29e-06	0.00053	4.14936
AC078923.1	-0.51327	0.774293	-4.29989	3.34e-05	0.003012	1.93415
ASS1	0.512707	6.92201	2.14416	0.033892	0.270044	-3.58369
CYSRT1	-0.51075	2.27478	-2.19147	0.030209	0.254137	-3.5101
CLPSL1	-0.51056	0.939702	-4.07119	8.1e-05	0.005743	1.34719
LINC02487	-0.51015	1.11224	-3.56094	0.000518	0.020894	-0.31377
LINC01413	0.510112	0.613274	3.14692	0.002049	0.052178	-2.35237
IGKV1OR2-3	0.509604	1.03939	2.29098	0.023583	0.224473	-3.40693
MIR149	-0.50926	0.878557	-3.55297	0.000532	0.021275	-0.2989
LINC01765	-0.50898	0.892092	-4.45569	1.79e-05	0.001883	2.69538
CDHR1	-0.50781	0.902418	-3.37352	0.00098	0.03226	-0.88732
AC006026.3	0.507321	2.11207	3.405	0.000882	0.029937	-1.06918
RP11-701H24.5	-0.50543	0.877962	-3.70504	0.000312	0.014692	0.055865
PCSK2	-0.50542	0.745944	-3.58234	0.000481	0.019888	-0.56704
ENTPD3	-0.50473	1.9287	-2.5126	0.013215	0.164349	-2.95024
AC123912.4	-0.50329	0.820799	-4.71436	6.18e-06	0.00085	3.6009
RNU6-1046P	0.503166	0.912191	5.8387	4.02e-08	1.72e-05	8.36067
RNVU1-18	-0.50074	0.928448	-3.61592	0.000428	0.018277	-0.12185
MIR1291	-0.50045	0.889595	-6.06038	1.39e-08	7.43e-06	9.33977
AC139792.1	-0.50016	1.12981	-5.04066	1.53e-06	0.000303	4.51816
PADI3	-0.50001	0.914968	-3.744	0.000272	0.013291	0.26485

## Sheet: DEG-AGT-Chemotherapy
Supplementary Table S4. Differentially expressed genes of AGT-high and AGT-low groups of chemotherapy in the TCGA-STAD cohort
Gene	logFC	AveExpr	t	P.Value	adj.P.Val	B
ITLN1	-1.76588	5.3283	-4.54046	1.08e-05	0.00393119	3.01871
AGT	-1.74007	6.35699	-14.3466	8.35e-31	4.78e-26	57.0591
REG3A	-1.63132	5.4168	-3.576	0.000458209	0.0281346	-0.180132
MIR3131	-1.62165	5.27674	-5.08389	9.96e-07	0.000982267	5.05449
REG1A	-1.59573	6.44565	-3.88976	0.00014535	0.0162775	0.738776
PRSS2	-1.50539	5.36505	-3.78234	0.000217072	0.0198434	0.452935
FABP1	-1.29019	5.20825	-2.91674	0.00403085	0.0838187	-1.99916
DEFA6	-1.26787	4.16486	-3.74185	0.000251957	0.0209267	0.275307
HSD3B2	-1.25307	3.596	-5.64615	7.04e-08	0.000167786	7.82972
ISX	-1.23725	4.10154	-4.52723	1.14e-05	0.00395735	2.89052
DEFA5	-1.2277	4.20606	-3.39087	0.000872216	0.0397043	-0.754513
C6orf58	-1.20098	4.6827	-3.10307	0.00225455	0.0628174	-1.53244
TRPA1	-1.18497	4.7862	-4.74573	4.48e-06	0.00249878	3.58345
DMBT1	-1.18121	6.17284	-3.2916	0.00121888	0.0470978	-1.11347
XPNPEP2	-1.1753	4.7939	-3.9635	0.000109848	0.0140348	0.932671
SPINK4	-1.15656	5.60721	-2.86068	0.0047755	0.0912324	-2.17895
CCL24	-1.1471	5.44517	-4.35359	2.35e-05	0.00601794	2.38589
WNT4	-1.14364	4.89207	-5.62897	7.65e-08	0.000172472	7.02684
SELP	-1.13643	5.35067	-4.91593	2.12e-06	0.00170964	4.44108
GKN1	-1.12322	5.35333	-2.21562	0.0280891	0.216681	-3.58071
IHH	-1.11189	6.02202	-4.173	4.86e-05	0.00876564	1.79924
SST	-1.11003	4.91961	-2.77536	0.0061522	0.1041	-2.33223
F2RL2	-1.1076	5.87516	-6.99742	6.25e-11	8.94e-07	14.1003
GSTA1	-1.10388	5.84898	-3.18564	0.00172793	0.0552418	-1.34986
CXCL14	-1.10364	6.63633	-6.05988	8.98e-09	4.28e-05	9.77712
CDX1	-1.10212	5.59292	-2.64851	0.00887124	0.124983	-2.6944
MEP1A	-1.08446	4.95081	-2.88945	0.00437891	0.0878271	-2.06094
DPEP1	-1.08166	5.00692	-3.132	0.00205512	0.0600776	-1.44888
HMGCS2	-1.08079	6.12758	-3.09134	0.0023404	0.0639599	-1.67921
EMID1	-1.06473	4.99247	-6.31769	2.38e-09	1.52e-05	10.0136
MMP3	-1.06092	5.56937	-2.89709	0.0042788	0.086309	-2.08164
LYPD8	-1.04636	4.09527	-3.82562	0.000184865	0.0181068	0.540429
SLC7A4	-1.04078	4.63205	-4.10291	6.4e-05	0.010149	1.3545
SFRP1	-1.04052	4.98393	-3.36158	0.000963496	0.0418339	-0.831343
FCER1A	-1.03999	4.61066	-4.09462	6.61e-05	0.010369	1.32979
CLCA1	-1.03661	4.10119	-3.32469	0.00109113	0.044379	-0.929608
RPS4Y1	-1.03485	5.64101	-2.20255	0.0290156	0.219778	-3.67603
SLC39A5	-1.03253	5.66364	-3.4943	0.00061066	0.0329844	-0.42671
ADH1B	-1.02604	4.96251	-3.27326	0.00129556	0.0484794	-1.07498
MAGEA12	-1.02601	4.29804	-2.66142	0.00855181	0.122777	-2.58951
GREM2	-1.02541	4.90757	-3.66221	0.000336612	0.0238403	0.0241025
APOA4	-1.02306	4.29045	-2.88111	0.00449072	0.0884633	-2.08152
PGC	-1.02304	6.6074	-2.6968	0.00772888	0.116947	-2.9195
ACKR1	-1.01447	5.78136	-3.75766	0.000237744	0.0204096	0.392478
OGN	-1.01383	5.42982	-3.1008	0.0022709	0.0629319	-1.53506
IGFBPL1	-1.0062	4.63178	-3.67957	0.000316147	0.0231454	0.0485289
SLC7A9	-1.00259	4.55559	-3.59378	0.000430167	0.0272008	-0.2047
MLN	-1.00098	3.94143	-3.85289	0.000166957	0.0173709	0.677861
GUCA2A	-1.00066	4.41056	-3.22034	0.00154278	0.0523338	-1.23208
GFRA1	-0.998165	4.75515	-3.94739	0.000116819	0.0143979	0.873408
DIO2	-0.995661	5.90188	-7.18889	2.17e-11	6.2e-07	15.0976
IGLV5-37	-0.992298	4.55418	-3.05172	0.0026531	0.0679805	-1.66579
CSAG1	-0.989797	4.52074	-2.48303	0.0140285	0.156223	-2.97081
FENDRR	-0.985624	5.29555	-4.71245	5.18e-06	0.00271922	3.64717
CREB3L3	-0.984953	4.90317	-3.12866	0.00207731	0.0604313	-1.46145
ALPI	-0.978593	4.52249	-3.1637	0.00185541	0.0569318	-1.38014
SOSTDC1	-0.973902	4.7147	-3.28576	0.00124283	0.0476713	-1.05623
SAA1	-0.971805	5.99516	-2.96931	0.00343073	0.0777534	-1.97862
CAPN6	-0.9679	5.54814	-2.99982	0.00312121	0.0742063	-1.81349
SCARA5	-0.967235	4.6712	-3.85192	0.000167563	0.0173713	0.567789
CPA3	-0.96586	5.95843	-4.67949	5.97e-06	0.0028831	3.69335
TTR	-0.965727	4.50001	-3.06039	0.00258159	0.0669692	-1.6451
PHYHIPL	-0.96086	4.12563	-4.80631	3.44e-06	0.0022384	3.86593
MMP10	-0.960593	4.92851	-3.45021	0.00071159	0.0354502	-0.588451
TM4SF20	-0.959359	5.33244	-2.47393	0.0143777	0.157894	-3.04475
OLFM4	-0.959	6.75754	-2.66072	0.0085688	0.122866	-3.08909
LINC00261	-0.958735	4.97005	-3.0523	0.00264831	0.0679805	-1.65569
NR0B2	-0.950925	5.82137	-3.59495	0.000428382	0.027178	-0.128369
SI	-0.950571	4.83866	-2.49081	0.0137363	0.154801	-2.96139
APOB	-0.945725	4.19324	-3.08249	0.0024071	0.064762	-1.58065
C7	-0.943953	5.42895	-2.82716	0.00527874	0.0966041	-2.23921
MUC17	-0.943468	5.72153	-2.57333	0.0109543	0.137698	-2.89974
ALKAL1	-0.943341	4.84355	-4.01475	9.02e-05	0.0125003	1.09788
HGF	-0.942076	4.69995	-5.89567	2.05e-08	7.43e-05	8.01925
GKN2	-0.940345	5.01259	-1.99244	0.0479756	0.274216	-3.93327
SHISA3	-0.935239	4.73815	-3.36237	0.000960918	0.0417853	-0.847591
A4GNT	-0.934394	4.65043	-2.7724	0.00620581	0.104498	-2.33743
PLA2G12B	-0.932689	4.13346	-3.44403	0.000726921	0.0357378	-0.601627
TSPAN7	-0.923176	5.4936	-4.88097	2.48e-06	0.00181125	4.36815
IGHV1-69	-0.920638	6.12235	-3.26142	0.00134745	0.0495241	-1.19216
CHGA	-0.920121	4.89012	-2.55992	0.0113688	0.140608	-2.81575
CHP2	-0.918612	4.63436	-2.54324	0.0119041	0.144053	-2.84518
IL13RA2	-0.91368	4.41138	-4.25139	3.55e-05	0.00736028	1.83094
DDX3Y	-0.911243	5.04815	-2.46046	0.0149083	0.160516	-3.0386
B3GNT6	-0.906758	4.6672	-2.70998	0.00744131	0.114949	-2.47981
CTNND2	-0.901243	4.10151	-4.34601	2.42e-05	0.00612493	2.2342
CEACAM7	-0.898877	5.50974	-2.52729	0.0124368	0.147369	-2.95907
CXCL5	-0.896761	6.02663	-2.40929	0.0170865	0.17163	-3.36084
KRT20	-0.896055	5.64288	-2.15475	0.0326344	0.231372	-3.77157
PID1	-0.890468	5.44142	-5.10673	8.98e-07	0.000982267	5.23669
VTN	-0.89022	4.84082	-3.07807	0.00244111	0.0652084	-1.59405
NDNF	-0.887231	4.92834	-3.86186	0.00016144	0.0171044	0.631817
CCL25	-0.885587	4.83325	-2.26773	0.0246457	0.203871	-3.41044
RGN	-0.883924	4.71301	-3.73904	0.000254563	0.0210211	0.226382
FDCSP	-0.883117	5.62194	-2.31291	0.0219647	0.192136	-3.44692
NEUROG3	-0.878846	4.09526	-3.37047	0.000934881	0.0411772	-0.804293
APOD	-0.878616	6.41558	-3.69755	0.000296175	0.0224019	0.0851301
PTGIS	-0.878148	5.66582	-3.18205	0.00174822	0.0554566	-1.3346
MAGEA6	-0.877707	4.48192	-2.08787	0.0383486	0.248299	-3.72926
C16orf89	-0.877585	4.84848	-3.14785	0.00195294	0.0586353	-1.41438
LINC01082	-0.873113	4.76648	-3.70206	0.000291359	0.0222608	0.122605
WFDC2	-0.872821	6.24509	-2.83473	0.00516101	0.095564	-2.41363
HIF3A	-0.87276	4.77365	-3.22742	0.00150732	0.0519304	-1.2099
PTGER1	-0.869351	5.07205	-3.73471	0.000258634	0.0211936	0.265594
RNF186	-0.868618	5.43094	-2.85656	0.00483497	0.0918003	-2.16698
ABCA8	-0.863835	4.51143	-3.7727	0.000224934	0.0201183	0.317402
DUOX2	-0.86338	5.6736	-2.41677	0.0167512	0.169935	-3.23976
IGHV1-67	-0.862534	4.972	-2.92292	0.00395564	0.0830689	-1.97933
PDGFRA	-0.859519	5.94265	-6.08985	7.71e-09	4.01e-05	9.75617
FREM1	-0.858964	4.15978	-4.38166	2.09e-05	0.0056214	2.32899
VAT1L	-0.856196	4.69508	-4.82893	3.12e-06	0.00209838	3.84247
SNORD114-3	-0.856146	4.14464	-3.70603	0.000287183	0.0220811	0.15755
SLCO2A1	-0.855233	6.18597	-5.74549	4.33e-08	0.000123797	8.25377
GUCY2C	-0.854536	5.52513	-2.75562	0.00651818	0.107461	-2.42816
MALRD1	-0.85071	4.03138	-3.33496	0.00105408	0.0437498	-0.896059
F10	-0.848242	5.04105	-3.73475	0.000258599	0.0211936	0.260558
TFF2	-0.848065	6.34578	-2.12152	0.0353747	0.23971	-4.10066
SMOC1	-0.844059	4.86129	-2.73333	0.0069551	0.110767	-2.42818
RGS7BP	-0.84293	4.35997	-5.12881	8.11e-07	0.000928556	4.95155
UGT2A3	-0.841293	4.82468	-2.38022	0.0184455	0.177824	-3.1878
SNCAIP	-0.838553	4.56171	-3.75958	0.000236075	0.0204073	0.275729
FER1L6	-0.835481	4.99712	-2.32514	0.0212843	0.189555	-3.3114
IGLV7-46	-0.834765	6.13284	-2.95283	0.00360935	0.0799609	-2.06346
APOA1	-0.834559	5.04502	-2.2066	0.0287259	0.218686	-3.54819
FAM3B	-0.832282	5.59313	-2.75268	0.00657426	0.107676	-2.44659
TPSAB1	-0.829214	6.19997	-4.38888	2.03e-05	0.00555566	2.57893
PCSK1N	-0.826024	5.6256	-2.23484	0.026773	0.21194	-3.60898
SELE	-0.824643	4.92846	-3.78577	0.000214339	0.0196566	0.396884
IGKV1-33	-0.821956	5.21978	-2.62679	0.00943302	0.128555	-2.69108
SLC13A2	-0.816684	4.41376	-2.52236	0.0126058	0.148286	-2.88838
C4BPA	-0.815417	4.79549	-2.76627	0.0063184	0.105601	-2.35176
FABP2	-0.814431	4.45099	-2.40783	0.0171523	0.171773	-3.12477
GP2	-0.812529	5.20974	-2.16305	0.0319791	0.229385	-3.65631
TBX10	-0.810785	4.25254	-3.35606	0.000981661	0.0420227	-0.861796
A1CF	-0.81028	4.66577	-2.97987	0.00332056	0.076591	-1.84438
PROM1	-0.809239	6.04478	-3.21043	0.00159367	0.0533329	-1.32175
ADAMTS8	-0.806793	4.64015	-3.36092	0.000965648	0.0418623	-0.858137
SORBS2	-0.806783	5.22708	-4.41477	1.82e-05	0.00523144	2.54324
SLC26A3	-0.80651	4.50488	-2.42234	0.0165056	0.168683	-3.09463
VWA2	-0.805372	5.21414	-3.09652	0.00230212	0.0635088	-1.53899
ADH1C	-0.802799	6.17327	-2.54896	0.0117181	0.142612	-3.09585
RNU7-159P	-0.802672	3.78592	-3.58108	0.000450021	0.0278109	-0.164412
HHIP	-0.802561	4.35576	-4.13255	5.7e-05	0.00950647	1.44461
VTRNA1-3	-0.7984	4.16349	-3.3436	0.00102385	0.0432698	-0.888879
MYCN	-0.797808	5.03357	-3.17811	0.00177075	0.0555984	-1.3267
ALDOB	-0.796427	5.71251	-2.25797	0.0252607	0.205716	-3.5859
SLC34A2	-0.796402	4.90893	-2.34689	0.0201204	0.184914	-3.26007
CPS1	-0.79598	5.2721	-2.07258	0.0397693	0.252092	-3.83685
MEOX1	-0.792857	4.90135	-4.26935	3.3e-05	0.00708732	1.94007
SLC6A19	-0.792622	4.87266	-2.19086	0.0298669	0.222489	-3.5593
RBP4	-0.790755	5.65003	-2.5707	0.0110345	0.138356	-2.88954
CD207	-0.789596	4.27979	-4.21878	4.05e-05	0.00806738	1.73962
MTTP	-0.788609	4.25844	-2.6464	0.00892447	0.125267	-2.6227
CSF3	-0.787188	4.77297	-2.49125	0.0137198	0.154788	-2.95691
FAT4	-0.786569	4.90299	-4.63301	7.29e-06	0.00320803	3.19887
MYOCD	-0.784908	4.81917	-3.05285	0.00264369	0.0679641	-1.65897
NRG1	-0.784852	4.23162	-3.8087	0.000196874	0.0186838	0.448573
IGHV3-49	-0.784679	6.34975	-2.78971	0.00589787	0.102091	-2.57128
APOA5	-0.78388	3.59766	-4.84004	2.97e-06	0.00202202	4.29175
NOS2	-0.781411	5.06717	-2.50727	0.0131355	0.151734	-2.94053
FABP6	-0.780718	4.95053	-2.86734	0.00468092	0.0902528	-2.11429
LHFPL4	-0.777384	3.66586	-4.21453	4.12e-05	0.00812095	1.92678
VSIG2	-0.774143	6.30122	-2.72991	0.00702457	0.111356	-2.70465
COL9A1	-0.773358	4.47947	-3.54898	0.00050415	0.029866	-0.339196
FGF10	-0.773109	4.40106	-3.48208	0.000637185	0.033669	-0.524697
HEPACAM2	-0.773004	4.6428	-2.44554	0.0155165	0.163856	-3.04843
RBP2	-0.772357	4.75877	-2.23526	0.0267449	0.211801	-3.46667
CNTN4	-0.771806	4.48641	-5.4472	1.83e-07	0.000338572	6.14993
IGLV3-9	-0.767701	5.86535	-2.54707	0.0117792	0.142988	-2.99907
REEP1	-0.766476	4.82834	-3.3434	0.00102454	0.0432698	-0.895174
SCN4B	-0.766432	4.50511	-4.24562	3.63e-05	0.00747894	1.79894
SMTNL2	-0.765592	4.2163	-3.73833	0.000255226	0.0210418	0.237263
TNXB	-0.763751	5.27723	-3.4047	0.000831994	0.0388667	-0.690171
NPC1L1	-0.762178	5.03569	-2.23123	0.0270157	0.213036	-3.49967
NBPF7	-0.76126	3.65875	-5.40058	2.29e-07	0.000363779	6.71956
GALNT16	-0.758257	4.18877	-4.39437	1.98e-05	0.00551069	2.35308
CLDN18	-0.758218	6.60216	-2.14941	0.0330623	0.232812	-4.17475
ANPEP	-0.75722	6.45516	-3.05089	0.0026601	0.0680495	-1.91237
FGB	-0.755884	4.17911	-2.41631	0.0167718	0.170008	-3.11777
CH25H	-0.754475	5.27974	-3.74507	0.000248998	0.0208321	0.328304
PCDHB5	-0.754282	4.48891	-3.53346	0.000532442	0.0307152	-0.384366
ADCY5	-0.753206	5.10889	-2.79733	0.00576679	0.100705	-2.28593
SLC51B	-0.751796	4.89293	-3.42843	0.00076702	0.0369163	-0.654484
CFI	-0.751765	6.10232	-5.72798	4.72e-08	0.000128508	8.15393
DENND2A	-0.75079	5.02379	-6.3491	2.02e-09	1.45e-05	10.1736
PCP4L1	-0.750356	4.43483	-2.64171	0.00904383	0.126076	-2.63104
ADH4	-0.748468	4.41253	-2.46587	0.0146931	0.159669	-3.0056
LSAMP	-0.748466	5.03776	-4.10801	6.28e-05	0.010116	1.44128
SORCS2	-0.748392	4.61487	-3.96007	0.000111297	0.0141221	0.888696
EDNRB	-0.747075	5.57872	-4.71373	5.15e-06	0.00271922	3.75297
IL11	-0.744233	4.81649	-2.83973	0.00508471	0.0946577	-2.18012
HABP2	-0.744056	5.41712	-2.22178	0.0276611	0.215235	-3.58402
CAVIN2	-0.742835	5.82856	-3.96839	0.000107813	0.0139586	1.09041
GPR20	-0.74279	4.49922	-4.61554	7.85e-06	0.00337841	3.05145
TNN	-0.740434	4.1976	-3.81112	0.000195112	0.0186091	0.461008
SUN3	-0.73815	3.71098	-3.92678	0.000126349	0.014841	0.942896
CRISPLD1	-0.737677	5.11641	-3.72416	0.000268813	0.0214468	0.240398
GPD1	-0.733197	5.3412	-2.73797	0.00686198	0.110057	-2.44596
TMEM100	-0.733142	4.51627	-3.06317	0.00255903	0.066777	-1.63993
SNORD116-4	-0.732883	4.37465	-2.84977	0.00493433	0.0927634	-2.15756
TNFRSF11B	-0.732057	5.34758	-3.26838	0.00131673	0.0488977	-1.07452
CLDN2	-0.731725	5.91786	-2.3574	0.0195784	0.182802	-3.4402
BPIFB2	-0.730929	3.71161	-3.38709	0.000883519	0.0399055	-0.785014
IGHJ1	-0.730923	4.6142	-2.23567	0.0267171	0.211722	-3.46051
BHMT2	-0.730907	4.51079	-3.77703	0.000221374	0.019995	0.325175
ABCG2	-0.730852	4.82507	-4.00593	9.33e-05	0.0128399	1.06066
IGLV10-54	-0.729565	5.79369	-2.33211	0.0209049	0.187972	-3.45552
SAA2	-0.729029	4.88538	-2.17209	0.0312786	0.226633	-3.59463
C3orf70	-0.729	5.21417	-3.29421	0.00120832	0.046816	-1.00452
ALAS2	-0.725863	3.70342	-4.25368	3.52e-05	0.00736028	2.09023
SPINK1	-0.725804	7.03077	-3.53415	0.000531151	0.0307152	-0.737846
SULT1C2	-0.72562	5.47639	-2.52936	0.0123665	0.146945	-2.94868
REG1B	-0.725579	4.15536	-2.25956	0.0251597	0.205361	-3.43159
ITGA8	-0.72413	5.23075	-3.28274	0.00125539	0.0478736	-1.03585
TFPI2	-0.723049	4.7591	-3.12852	0.00207823	0.0604313	-1.46911
MMRN1	-0.722782	4.7967	-3.07354	0.00247642	0.0657177	-1.6078
UPB1	-0.72144	3.68379	-3.86827	0.0001576	0.0168892	0.724301
SMAD9	-0.720199	5.20847	-3.54176	0.000517136	0.0302903	-0.295838
TPSB2	-0.720171	5.9743	-3.43399	0.000752492	0.0364008	-0.646815
C3orf36	-0.717637	4.39509	-4.87049	2.59e-06	0.00183328	3.97137
ABCB1	-0.716496	4.95228	-4.26478	3.36e-05	0.0071554	1.93756
B3GNT8	-0.716217	5.69277	-4.3336	2.54e-05	0.00619643	2.3642
NEURL1	-0.714775	4.6227	-3.1783	0.00176965	0.0555984	-1.34561
IGKV1D-33	-0.713757	5.08009	-2.2201	0.0277773	0.215829	-3.52696
IGHV3-20	-0.713596	5.60708	-2.28204	0.0237667	0.20018	-3.50826
IL33	-0.713351	5.77864	-3.33526	0.00105302	0.0437498	-0.911465
PAMR1	-0.712675	5.00626	-4.30238	2.89e-05	0.00661329	2.08174
MAMDC2	-0.712292	4.62622	-2.71328	0.00737061	0.114194	-2.47197
FAM107A	-0.712228	4.93572	-3.50006	0.000598513	0.0329332	-0.447211
ADGRL3	-0.711725	4.26757	-4.56293	9.82e-06	0.00374516	2.90394
CPED1	-0.711562	5.41014	-3.30942	0.00114844	0.0455772	-0.959872
MADCAM1	-0.710904	4.68772	-2.89923	0.00425117	0.0860902	-2.03989
IGKV1D-39	-0.710552	5.60225	-2.19936	0.0292455	0.220651	-3.67364
SMIM24	-0.707761	6.61395	-3.24249	0.00143442	0.0507957	-1.42599
ELN	-0.70702	6.16537	-3.6893	0.00030519	0.0228	0.12161
ADAM33	-0.703476	4.78991	-2.98382	0.00328018	0.0762765	-1.83236
ADGRD1	-0.703232	4.41616	-3.71724	0.000275687	0.0216257	0.148849
GASK1A	-0.702832	4.4525	-3.53393	0.000531567	0.0307152	-0.382814
CHRDL1	-0.699271	4.92383	-2.15706	0.0324512	0.230804	-3.62649
CD1C	-0.698353	4.8943	-2.90404	0.00418956	0.0855563	-2.02572
CLDN11	-0.697624	4.46918	-3.7967	0.000205839	0.0191712	0.381697
CYP4F2	-0.697075	4.3131	-2.53561	0.0121564	0.145627	-2.86133
KDM5D	-0.695085	4.72503	-2.1377	0.0340168	0.235244	-3.64473
LRRC4B	-0.694477	4.85968	-4.23364	3.81e-05	0.00769871	1.80756
UST	-0.694305	5.20427	-3.24896	0.00140409	0.0502796	-1.12962
COL4A5	-0.693874	5.13556	-3.04385	0.00271972	0.0690807	-1.67554
APLNR	-0.69369	6.18982	-4.53153	1.12e-05	0.0039345	3.12327
PI16	-0.693466	4.68445	-2.25905	0.0251919	0.205507	-3.41801
CLEC3B	-0.692581	5.4871	-3.76586	0.000230683	0.0203355	0.414196
SULT1C4	-0.691577	4.46249	-4.44129	1.63e-05	0.00489552	2.44557
EPHA7	-0.69137	4.31573	-2.76793	0.00628766	0.105385	-2.34772
ANK2	-0.689404	4.53992	-3.33302	0.00106102	0.0437498	-0.939247
OIT3	-0.68903	4.35118	-4.12928	5.77e-05	0.00960172	1.42607
IGLV4-60	-0.688332	5.28544	-2.01388	0.0456499	0.26792	-3.94633
COL14A1	-0.687357	5.89969	-3.40194	0.000839893	0.0390777	-0.730899
GLP2R	-0.68646	4.02396	-3.97114	0.000106684	0.0139386	1.0117
CRABP1	-0.686247	4.52831	-2.02276	0.0447158	0.265156	-3.84052
GCG	-0.686079	3.61747	-4.75678	4.27e-06	0.00247019	3.99215
MS4A2	-0.685981	4.46673	-3.92879	0.000125387	0.0147641	0.784495
NFASC	-0.685466	4.78441	-3.21432	0.00157349	0.0528741	-1.24489
NKX2-3	-0.684883	4.48578	-3.71623	0.00027671	0.0216257	0.142798
FZD10	-0.681795	4.54696	-2.95007	0.00364007	0.0802415	-1.91921
FMO3	-0.681723	5.04386	-3.94866	0.000116251	0.0143972	0.927036
C10orf99	-0.681388	4.13894	-2.01121	0.0459344	0.268585	-3.88832
IGHV1-14	-0.680631	4.4968	-2.42685	0.0163091	0.167439	-3.08447
AOX1	-0.680392	4.59006	-3.06726	0.00252617	0.0662829	-1.62987
GPBAR1	-0.679994	5.12934	-3.29523	0.00120421	0.0467942	-1.00539
ZNF423	-0.679964	4.90658	-3.63272	0.000374297	0.0255415	-0.066386
CCL19	-0.678947	5.81439	-2.18425	0.0303574	0.224092	-3.76701
RFLNA	-0.678168	6.21501	-3.25207	0.00138975	0.0501133	-1.24894
EIF1AY	-0.677515	4.74438	-2.03456	0.0434995	0.261632	-3.82861
GALNT17	-0.676152	4.39406	-4.26078	3.42e-05	0.0072449	1.84968
PLCB4	-0.674818	5.61715	-3.61774	0.00039492	0.02634	-0.0474966
NRCAM	-0.674795	4.80374	-3.1849	0.0017321	0.0553131	-1.32123
IGKV1-17	-0.674484	6.23177	-2.24867	0.0258598	0.208372	-3.78996
ADGRG7	-0.671013	4.97797	-2.11335	0.0360778	0.241834	-3.71286
LRRC19	-0.668839	4.49633	-2.7076	0.00749249	0.115243	-2.48463
MATN2	-0.668808	5.83304	-3.43747	0.000743543	0.0362433	-0.614661
HAGLR	-0.668104	4.74345	-3.32773	0.00108004	0.044053	-0.94527
UNC5C	-0.667722	4.54833	-4.90484	2.23e-06	0.00173222	4.08251
FOLR1	-0.667587	5.15304	-1.98068	0.0492925	0.277204	-3.97745
ST8SIA6-AS1	-0.666685	3.86906	-2.70853	0.00747239	0.115167	-2.52475
HSPB6	-0.664938	6.40789	-2.81931	0.0054034	0.0973906	-2.52039
SOAT2	-0.663683	3.89881	-3.49317	0.000613068	0.0330042	-0.428989
FGF19	-0.663642	4.01945	-2.53319	0.0122372	0.146167	-2.888
FRZB	-0.663033	5.88859	-3.48813	0.000623925	0.0333147	-0.467843
CEACAM5	-0.662985	6.95971	-2.71057	0.00742861	0.114801	-3.09639
IGKV1-39	-0.662864	5.72176	-2.07321	0.0397102	0.252	-3.95337
TPSD1	-0.662067	4.6764	-2.40436	0.0173103	0.172429	-3.13212
WNT2B	-0.662062	4.70385	-4.20447	4.28e-05	0.00819931	1.67613
CXCL6	-0.661436	5.14017	-2.22902	0.0271656	0.213693	-3.51858
TSPAN11	-0.661188	5.13269	-3.74373	0.000250223	0.0208959	0.303002
MIR1268B	-0.661133	3.78423	-3.62818	0.000380436	0.0257819	-0.0164993
EPHB1	-0.660765	4.50524	-3.41166	0.000812428	0.0382965	-0.726449
ALX1	-0.660106	3.65796	-3.65962	0.000339774	0.0239752	-0.00191933
LINC00543	-0.659894	5.21048	-3.20125	0.00164223	0.0539486	-1.25949
ADTRP	-0.659471	5.20095	-2.30183	0.022597	0.194925	-3.38437
SLC5A9	-0.65932	4.36461	-3.15945	0.00188109	0.0574733	-1.39451
BMP7	-0.658719	5.11668	-2.39603	0.0176949	0.174429	-3.18052
MUC12	-0.658472	4.42413	-2.31223	0.0220032	0.192274	-3.3123
URAD	-0.657688	3.66449	-4.27543	3.22e-05	0.00706473	2.15088
MOGAT2	-0.657037	4.9413	-1.99225	0.0479957	0.274249	-3.92222
IGLV4-69	-0.656953	6.40807	-2.50516	0.0132113	0.152236	-3.29921
MAGEC2	-0.656774	3.70731	-3.07523	0.00246318	0.0655313	-1.68173
CCDC3	-0.656436	6.1155	-6.52903	7.85e-10	7.49e-06	11.9513
IGHV3-64	-0.656381	5.24525	-2.09632	0.0375821	0.246241	-3.78844
RETNLB	-0.65638	4.00416	-3.01984	0.0029323	0.0716497	-1.737
CDX2	-0.656089	5.62542	-2.12706	0.034904	0.23813	-3.82249
LAMA2	-0.654531	5.31112	-3.56267	0.000480354	0.0291503	-0.225006
SELENOP	-0.654071	6.1999	-3.87594	0.000153119	0.0166783	0.737011
SHH	-0.653806	5.19431	-2.78011	0.00606699	0.103571	-2.33208
PCDH18	-0.653651	5.7342	-4.89767	2.3e-06	0.00173222	4.51403
PGM5	-0.652506	5.15442	-2.29436	0.0230329	0.196849	-3.39219
IGHD3-10	-0.652326	4.1956	-2.22272	0.0275965	0.215155	-3.49477
SHROOM4	-0.650972	5.14986	-5.15288	7.27e-07	0.000848507	5.26481
TSPAN18	-0.650711	5.91673	-4.28624	3.08e-05	0.00685685	2.20925
IGHV3OR16-9	-0.650438	4.98021	-2.20566	0.0287923	0.218872	-3.54161
ITIH5	-0.649975	5.14015	-3.23349	0.00147755	0.051526	-1.17384
IGKV2-28	-0.648885	5.15387	-2.14023	0.0338081	0.234865	-3.68983
DDC	-0.648857	5.78668	-2.47308	0.0144104	0.15802	-3.14693
IGKV2D-28	-0.648787	4.97654	-2.17193	0.031291	0.226665	-3.60463
TCF21	-0.648745	4.99141	-3.78191	0.000217415	0.0198434	0.395439
SEMA6A	-0.648442	5.41871	-3.13411	0.00204125	0.0599657	-1.44547
CD302	-0.647377	5.43615	-4.07522	7.13e-05	0.0107159	1.4224
BTNL8	-0.646634	5.21068	-2.28117	0.0238198	0.200399	-3.42714
TEK	-0.646575	5.37981	-4.28919	3.05e-05	0.00683952	2.14654
STMN2	-0.645696	4.41254	-2.61196	0.00983447	0.131016	-2.69574
OTC	-0.645253	4.44225	-1.97994	0.0493761	0.277373	-3.9136
DSCR8	-0.645032	3.88982	-2.26051	0.0250995	0.205133	-3.4991
RERG	-0.644817	5.15184	-3.00204	0.00309974	0.0739416	-1.78275
IGF2BP1	-0.644511	4.2141	-2.11092	0.0362889	0.242316	-3.69957
SLITRK6	-0.64189	4.39073	-2.85417	0.00486967	0.0921612	-2.14768
CYP2B6	-0.641706	5.05491	-1.98606	0.0486855	0.276041	-3.95019
SIGLEC6	-0.641449	4.29044	-3.76072	0.000235083	0.0203999	0.288361
IGKV3D-11	-0.640723	5.40146	-2.20585	0.0287789	0.218863	-3.61265
LINC01611	-0.640691	3.7128	-4.30386	2.87e-05	0.00659998	2.27371
HMCN1	-0.64	4.81504	-3.2308	0.00149067	0.0517606	-1.1999
SCARA3	-0.639922	5.84704	-3.48381	0.000633377	0.0335297	-0.475842
MT1H	-0.639552	5.29385	-2.09649	0.0375674	0.24623	-3.79814
IL1RL1	-0.638336	4.28897	-3.56114	0.000482959	0.0292154	-0.295972
ATOH1	-0.638018	4.36351	-2.13518	0.0342246	0.235822	-3.64497
IGF1	-0.637921	4.1267	-3.53372	0.000531969	0.0307152	-0.350865
SALL1	-0.637008	4.26749	-3.72039	0.000272532	0.0214974	0.171614
SVEP1	-0.636734	4.90596	-3.07162	0.00249156	0.0659135	-1.60879
LRRC31	-0.634595	5.07323	-2.45991	0.0149303	0.160541	-3.04204
MARK1	-0.633009	4.86202	-3.17829	0.00176974	0.0555984	-1.33538
LYVE1	-0.632521	4.8174	-3.34742	0.00101074	0.0429402	-0.886116
SCGN	-0.628736	4.15076	-2.29394	0.0230573	0.196849	-3.36378
RNU6-85P	-0.628338	3.62354	-5.09997	9.26e-07	0.000982267	5.41067
ANO3	-0.628125	3.65416	-5.42634	2.03e-07	0.000343375	6.8354
IGHV1-12	-0.627223	4.5341	-2.3321	0.0209055	0.187972	-3.27276
MIR3193	-0.627111	3.66959	-4.1255	5.86e-05	0.00968943	1.61614
GAL3ST2	-0.626881	4.71381	-2.17144	0.0313289	0.22674	-3.58204
GSTA2	-0.625929	4.47726	-2.00535	0.0465633	0.270137	-3.8696
MT1A	-0.624816	5.14067	-2.26638	0.0247297	0.204122	-3.44572
VSTM2L	-0.62476	4.96153	-2.29761	0.0228423	0.196239	-3.36171
MUSK	-0.624736	3.99887	-4.02871	8.55e-05	0.0120483	1.20557
UNC93A	-0.623726	4.46558	-2.25431	0.0254949	0.2068	-3.42209
SLC7A10	-0.623651	3.73836	-3.54044	0.00051953	0.0303684	-0.301278
TRABD2B	-0.623593	4.47791	-3.36399	0.000955648	0.0416511	-0.85677
RAI2	-0.622827	5.9706	-3.98352	0.000101739	0.0134771	1.13581
CTSG	-0.621393	4.28058	-2.71947	0.00724004	0.112953	-2.45837
BTNL3	-0.621107	4.73416	-1.9886	0.0484018	0.275364	-3.90659
PTGS1	-0.620577	5.77719	-3.901	0.000139314	0.0159448	0.863784
CA8	-0.620575	5.03716	-2.49631	0.013533	0.1538	-2.96128
PI15	-0.620551	4.69338	-2.89033	0.00436733	0.0877238	-2.06135
GBA3	-0.620275	4.13052	-2.47576	0.0143066	0.157687	-2.99632
DES	-0.620125	6.64568	-2.10708	0.036625	0.243371	-4.28816
EPHA3	-0.618602	5.08622	-2.75445	0.00654056	0.107461	-2.38621
INMT	-0.618092	5.26255	-3.00534	0.00306806	0.0734	-1.77748
VIPR2	-0.617679	4.13203	-3.09574	0.00230787	0.0635088	-1.54627
ZFY	-0.617659	4.57488	-2.08384	0.038719	0.249391	-3.73383
SLIT3	-0.617521	5.27431	-2.93784	0.00377924	0.0812329	-1.95005
FOXF1	-0.617453	6.10432	-4.05531	7.71e-05	0.0113129	1.37302
OTULINL	-0.616278	5.72723	-4.14871	5.35e-05	0.00932715	1.7101
PREX2	-0.614428	4.75382	-4.39962	1.94e-05	0.00544564	2.33495
DMD	-0.612829	4.85949	-2.83499	0.00515709	0.095564	-2.19125
CNR1	-0.610865	4.29764	-2.66712	0.00841413	0.121993	-2.57551
ITGA7	-0.610277	5.66079	-3.58507	0.000443692	0.0276286	-0.14983
DACH1	-0.609685	4.85608	-2.72121	0.0072037	0.112777	-2.45552
LINC02565	-0.608878	3.5672	-3.25513	0.00137579	0.0500199	-1.46476
C14orf132	-0.606924	5.13261	-2.85945	0.00479317	0.0913704	-2.13737
NTS	-0.605119	4.32659	-2.20297	0.0289855	0.219643	-3.52187
CAPN13	-0.602722	4.77527	-2.48463	0.0139679	0.155977	-2.96993
ITIH1	-0.602588	3.5568	-4.11637	6.07e-05	0.00995747	1.39582
RNU7-161P	-0.602344	3.76124	-3.22364	0.00152617	0.0521413	-1.23302
NCAM1	-0.601353	4.34315	-2.79955	0.00572916	0.100433	-2.27495
IGKV3-7	-0.601182	4.90844	-2.0529	0.041664	0.256771	-3.81239
SAMD11	-0.600064	5.067	-3.21217	0.00158462	0.0531215	-1.23442
TGFB2	-0.599598	5.07207	-3.39586	0.00085752	0.039375	-0.728926
IGHV3-35	-0.599479	4.63223	-2.18777	0.0300957	0.223106	-3.54866
DNASE1L3	-0.599353	4.533	-2.88073	0.00449585	0.0884822	-2.08572
AQP10	-0.599285	3.697	-2.38323	0.0183006	0.177233	-3.43145
TYRP1	-0.598819	4.66973	-2.46845	0.0145914	0.15917	-3.00061
SCRG1	-0.598427	4.34498	-2.24288	0.0262384	0.210062	-3.44666
RGMA	-0.598223	5.16756	-2.11398	0.0360232	0.2417	-3.74109
L1CAM	-0.597962	5.01931	-2.03775	0.0431749	0.2609	-3.85406
F2RL3	-0.597374	5.57995	-3.73965	0.000253999	0.0210048	0.33546
MN1	-0.596665	5.3646	-2.60208	0.0101107	0.132766	-2.76588
RNU6-1189P	-0.596371	3.88177	-3.11397	0.00217741	0.0616959	-1.49735
MAGEC1	-0.596042	3.59492	-3.29531	0.0012039	0.0467942	-1.2381
ADRA2A	-0.594979	5.80604	-2.14742	0.0332223	0.233148	-3.83786
CHRDL2	-0.593876	5.77358	-2.08328	0.038771	0.249391	-3.95147
UTY	-0.59351	4.40624	-2.21386	0.0282123	0.217028	-3.49875
SYNPO2	-0.59332	5.85608	-2.14861	0.0331263	0.232967	-3.85214
BMP3	-0.592989	4.14383	-2.25503	0.0254491	0.206574	-3.43999
PLAGL1	-0.592941	5.41725	-3.86143	0.0001617	0.0171044	0.714338
NR5A2	-0.592652	5.06119	-3.23112	0.00148911	0.0517402	-1.18374
CCL15	-0.592293	5.28628	-2.41911	0.0166478	0.169459	-3.15615
PLA2G2A	-0.591342	6.57556	-2.1486	0.0331273	0.232967	-4.16656
ZG16	-0.591092	3.87005	-2.93399	0.00382408	0.0818081	-1.96913
SPTLC3	-0.589915	4.84088	-3.05041	0.00266411	0.0680912	-1.66515
IGHA2	-0.589752	7.07708	-2.98871	0.00323083	0.0756636	-2.42497
GPC3	-0.589287	5.72723	-2.13648	0.034117	0.235368	-3.83479
ITGA9	-0.588816	5.50072	-3.34605	0.00101542	0.0430656	-0.857649
KIT	-0.586384	5.30102	-3.08028	0.00242408	0.0649745	-1.5838
RNA5SP290	-0.586253	3.71828	-4.591	8.72e-06	0.00356259	3.34838
TSPYL5	-0.586181	5.31886	-2.70023	0.00765313	0.116411	-2.53298
LINC01738	-0.585598	3.58769	-5.3229	3.3e-07	0.000484226	6.36795
CHST13	-0.585315	4.90017	-2.21014	0.028474	0.217723	-3.52396
VNN1	-0.585276	5.93493	-2.13853	0.0339479	0.23508	-3.90054
SERPINE2	-0.584528	5.66337	-3.27234	0.00129954	0.0484794	-1.08049
FBLN1	-0.583562	6.43896	-3.1318	0.00205646	0.0600776	-1.67795
IYD	-0.5835	5.12073	-2.26304	0.0249397	0.204763	-3.44934
RASL11A	-0.582882	5.87936	-3.63438	0.00037207	0.02553	-0.0111888
TEX15	-0.582704	3.6917	-3.01841	0.00294543	0.071848	-1.87082
NOVA1	-0.582656	4.1462	-3.31906	0.00111196	0.044749	-0.956575
LMO3	-0.582448	4.2205	-3.5773	0.000456109	0.0280751	-0.242155
MIR5190	-0.582272	4.42491	-2.49262	0.0136691	0.154591	-2.94875
LINC01139	-0.581881	3.86518	-3.06291	0.00256112	0.066777	-1.63721
PRKAR2B	-0.581773	5.4946	-3.14208	0.00198959	0.0591769	-1.42895
IGDCC4	-0.581652	4.76917	-4.09478	6.61e-05	0.010369	1.33019
ABI3BP	-0.581477	5.347	-2.34928	0.0199959	0.184503	-3.31274
C3orf85	-0.581315	3.89815	-2.68826	0.00792069	0.118533	-2.5624
PTCH1	-0.580772	5.36124	-3.73048	0.000262666	0.0212828	0.292448
PLD4	-0.58061	4.48385	-2.70628	0.00752107	0.115451	-2.48758
ADAMTSL2	-0.580213	5.38396	-3.60346	0.000415586	0.0267682	-0.0970624
IGKV1-6	-0.58001	6.23644	-2.13741	0.0340401	0.235302	-4.02245
TUB	-0.579918	4.41957	-3.18275	0.00174428	0.0554544	-1.33688
RNU6ATAC41P	-0.579349	3.62022	-4.44772	1.59e-05	0.0048913	2.76998
MUC20	-0.579261	5.83961	-2.27486	0.0242043	0.20203	-3.59224
RNU6-957P	-0.578802	3.73289	-4.13397	5.67e-05	0.00950647	1.66335
P2RX3	-0.578312	3.90357	-3.47467	0.000653799	0.0340763	-0.485485
WNT5A	-0.57791	5.78396	-4.25619	3.48e-05	0.00732583	2.095
MOGAT3	-0.576869	5.0378	-1.99288	0.0479262	0.274071	-3.93547
SAMD5	-0.576637	5.71666	-2.69239	0.0078274	0.117661	-2.61954
NEGR1	-0.575916	4.64023	-2.74324	0.00675773	0.109119	-2.40421
CCL11	-0.575788	6.06054	-2.56583	0.0111842	0.139197	-3.01856
NLGN4Y	-0.575586	4.26508	-2.58765	0.0105264	0.135642	-2.75035
IGKV2-30	-0.574092	5.96403	-2.00805	0.0462724	0.26935	-4.16069
DPPA3	-0.572964	3.65474	-3.32348	0.00109556	0.0444012	-1.03061
SNORD116-24	-0.572362	4.05807	-2.68986	0.00788459	0.118302	-2.53263
C1QTNF7	-0.571953	4.44652	-2.66515	0.0084615	0.122341	-2.57906
GFRA3	-0.571554	4.67317	-2.22959	0.0271273	0.213533	-3.47168
KIF26A	-0.571037	5.23887	-2.39027	0.0179653	0.175831	-3.20936
ZSCAN18	-0.570756	4.89774	-2.91061	0.00410672	0.0848721	-2.00979
CFTR	-0.570659	5.49212	-2.09048	0.0381108	0.247524	-3.85629
EML1	-0.570084	5.35846	-3.22219	0.00153341	0.0521797	-1.20271
TRPC4	-0.569643	4.23548	-3.79581	0.000206516	0.0191712	0.401489
KCNK3	-0.56964	4.47031	-2.36275	0.0193073	0.181823	-3.21211
GLI1	-0.569129	4.85098	-3.0574	0.00260607	0.0673296	-1.64703
RAB3C	-0.568714	4.1079	-3.19413	0.00168083	0.0545025	-1.28855
JAM2	-0.567746	5.34387	-3.01084	0.00301592	0.07279	-1.76754
DTNA	-0.566992	4.3983	-2.89921	0.00425135	0.0860902	-2.04142
QPRT	-0.56662	5.51086	-2.25009	0.0257673	0.208066	-3.55058
SIGLEC17P	-0.566172	4.24613	-3.70576	0.000287465	0.0220811	0.12935
ZNF521	-0.566085	5.11311	-3.73799	0.000255549	0.0210418	0.282267
WFDC1	-0.56589	5.03562	-2.94942	0.00364742	0.0802433	-1.91399
RNA5SP343	-0.565469	3.57977	-5.07125	1.05e-06	0.000989613	5.2695
CEBPA	-0.564942	6.19939	-3.50533	0.000587594	0.032678	-0.476774
TGFB2-AS1	-0.564816	4.79911	-3.06312	0.00255938	0.066777	-1.63466
HKDC1	-0.564623	5.94856	-2.54875	0.0117248	0.142612	-3.02273
USP2	-0.564444	4.67757	-2.80325	0.00566678	0.0999037	-2.26637
ALDH1A1	-0.564045	6.82418	-3.20654	0.00161408	0.0535151	-1.64137
SLC7A2	-0.563789	5.22726	-2.19341	0.0296797	0.221961	-3.60211
RNU7-4P	-0.5637	3.6791	-3.28567	0.00124321	0.0476713	-1.11199
DEFB1	-0.563521	5.81294	-2.05909	0.0410606	0.255453	-4.01208
FLRT2	-0.56287	4.18844	-3.64206	0.000361957	0.0251071	-0.0484659
XDH	-0.562704	5.20674	-2.37576	0.0186621	0.178798	-3.23476
METTL24	-0.562549	4.47666	-2.28129	0.0238122	0.200364	-3.37049
VWF	-0.562059	6.45413	-4.97502	1.63e-06	0.00139133	4.88476
RNU6-62P	-0.561689	3.82809	-3.3806	0.000903253	0.0404038	-0.757926
RBMS3	-0.561296	4.98844	-3.32861	0.00107686	0.0440175	-0.923209
PHACTR3	-0.560424	4.02192	-2.80691	0.00560579	0.0992258	-2.26233
PRKAA2	-0.560338	4.42184	-2.21316	0.0282615	0.217116	-3.49928
KL	-0.560324	4.34876	-3.49617	0.000606699	0.0329839	-0.487977
PAPLN	-0.558843	5.41138	-3.41457	0.000804366	0.0380419	-0.658026
PLXNA4	-0.555203	4.30668	-2.96654	0.00346018	0.0782038	-1.87729
CES1	-0.554645	5.24042	-1.98902	0.0483555	0.275315	-3.98094
KLHL13	-0.554237	4.50503	-2.90529	0.00417364	0.085442	-2.0276
MAGEA10	-0.553446	3.78081	-2.19511	0.029555	0.221601	-3.70419
IGHV7-56	-0.553335	4.26784	-2.10633	0.0366912	0.24364	-3.70187
FBXO17	-0.552286	4.95077	-2.61718	0.00969159	0.130129	-2.69238
CD1E	-0.551613	4.28578	-2.95767	0.00355607	0.0793146	-1.89851
ADAMTSL3	-0.551491	4.4912	-2.64818	0.0088795	0.124983	-2.61633
RNA5SP324	-0.551394	3.6392	-5.33308	3.15e-07	0.000473785	6.42727
RNU6-1176P	-0.550705	4.45806	-2.55775	0.0114372	0.140804	-2.81158
TNFSF18	-0.549863	4.15915	-3.07542	0.00246172	0.0655313	-1.60017
SCN7A	-0.548655	4.08617	-2.45143	0.0152738	0.162547	-3.05167
ARHGAP28	-0.548463	4.23023	-4.58753	8.85e-06	0.00356455	2.99312
TRPM6	-0.546475	3.90967	-3.60023	0.000420404	0.0269709	-0.112372
LRRC10B	-0.545924	4.49924	-2.64184	0.00904037	0.126059	-2.63021
PDZD2	-0.545807	4.75307	-4.13888	5.56e-05	0.00943723	1.46777
PDE1A	-0.545535	4.87854	-3.27682	0.00128035	0.0482671	-1.07298
NSG1	-0.545376	4.66235	-2.59087	0.0104325	0.134945	-2.74173
CHRD	-0.545194	4.9276	-3.11949	0.00213927	0.0611804	-1.48514
GTSF1	-0.544991	4.37699	-2.17627	0.0309592	0.225964	-3.56841
ABCC6	-0.544535	4.92264	-3.18351	0.00173996	0.0554247	-1.31837
GREB1	-0.543766	4.25968	-4.00398	9.4e-05	0.0128744	1.03888
PARM1	-0.543218	6.05167	-3.6555	0.000344863	0.0242562	0.0321118
PCSK1	-0.543169	4.11515	-2.92494	0.00393127	0.0829363	-1.97453
MT1M	-0.542477	5.1395	-2.03716	0.0432347	0.261107	-3.87556
FAXDC2	-0.542165	5.24837	-2.99334	0.00318468	0.0749916	-1.80773
COL4A4	-0.542089	4.66346	-2.42918	0.0162084	0.166796	-3.0806
IGF2	-0.541595	6.22276	-2.48941	0.0137883	0.155081	-3.25872
TM4SF5	-0.541159	6.29623	-2.5679	0.0111203	0.138885	-3.10372
IGHV4-34	-0.540522	6.66048	-2.45185	0.0152563	0.162512	-3.55259
ABCC6P1	-0.539655	4.33658	-2.82807	0.00526459	0.0965051	-2.20879
PNMA8A	-0.539484	4.50165	-2.38245	0.018338	0.177325	-3.17247
GABRA3	-0.539037	4.03448	-2.00162	0.0469681	0.271277	-3.92321
ITGBL1	-0.538861	4.84448	-1.9785	0.0495399	0.277674	-3.93318
SGCA	-0.53868	4.94566	-2.07472	0.0395678	0.251478	-3.77806
GLDC	-0.538499	4.31379	-2.1792	0.030737	0.225161	-3.56546
RHOBTB3	-0.537699	5.77686	-3.7175	0.000275427	0.0216257	0.26227
GNAO1	-0.536965	4.82509	-2.11115	0.0362688	0.242291	-3.69938
ENPP2	-0.536496	5.77319	-3.45013	0.00071178	0.0354502	-0.570122
PPP1R14A	-0.536391	5.97211	-3.08368	0.00239805	0.0646078	-1.66519
FGF2	-0.533773	4.77358	-2.56657	0.0111614	0.139126	-2.79617
CACHD1	-0.533623	5.33356	-3.42097	0.000786916	0.0374954	-0.640956
PTCH2	-0.533264	4.68871	-2.94668	0.00367817	0.0803894	-1.92615
MIR4482	-0.532739	4.81693	-2.5257	0.0124911	0.147658	-2.88485
ACTC1	-0.529097	4.72819	-2.15965	0.0322465	0.230227	-3.60396
SHE	-0.528879	4.78396	-4.07849	7.04e-05	0.0106609	1.28013
LGALS2	-0.52879	6.28361	-2.55266	0.0115988	0.141773	-3.13557
RASSF9	-0.528187	4.71904	-2.92668	0.00391039	0.0828494	-1.97392
TNFSF11	-0.526907	4.67493	-2.91693	0.00402845	0.0837994	-1.99815
ELMO1	-0.526785	5.5149	-4.31811	2.71e-05	0.00640903	2.27975
VIL1	-0.526495	6.34699	-2.49003	0.0137653	0.154882	-3.30899
USP9Y	-0.526391	4.42835	-1.99504	0.0476881	0.273344	-3.88567
PDE2A	-0.526244	4.86643	-2.98865	0.00323143	0.0756636	-1.81883
CXXC4	-0.525984	4.43727	-3.07174	0.00249056	0.0659135	-1.62047
MAN1C1	-0.525774	5.26875	-3.28844	0.00123181	0.047437	-1.01908
CXCL12	-0.525508	5.86223	-2.89988	0.00424272	0.0860057	-2.13257
ANO5	-0.524877	4.68521	-2.46065	0.0149005	0.160462	-3.01672
PDZRN3	-0.524485	5.5834	-2.56175	0.0113115	0.140141	-2.89714
MS4A10	-0.524039	3.67443	-2.45507	0.0151254	0.161697	-3.31617
STUM	-0.523996	4.16016	-2.38079	0.0184177	0.177675	-3.18877
RNU7-137P	-0.523992	3.68081	-3.50349	0.000591401	0.0327624	-0.47075
MAPK10	-0.522839	4.32598	-3.20736	0.00160978	0.0535151	-1.27001
IGKV1-9	-0.522643	6.49911	-2.1421	0.0336552	0.234415	-4.13925
CPA6	-0.522408	3.96413	-2.6564	0.00867482	0.123662	-2.61997
PLCB1	-0.522174	5.26152	-3.66255	0.00033621	0.0238403	0.072382
TSPY26P	-0.522118	4.95584	-2.92702	0.00390644	0.0827963	-1.96935
COL4A6	-0.52141	4.35842	-2.14246	0.0336259	0.234325	-3.63082
SPON1	-0.521279	6.17974	-2.33755	0.020613	0.186587	-3.58095
MFAP4	-0.521072	6.81198	-3.53098	0.000537118	0.0309538	-0.628688
IGHJ1P	-0.520871	3.95327	-2.14923	0.0330761	0.232876	-3.68156
GGT7	-0.520853	5.8926	-3.67069	0.000326462	0.0234517	0.103051
ADAM23	-0.520794	4.51646	-3.07998	0.0024264	0.0650061	-1.6002
MIR548XHG	-0.520677	3.61351	-3.64743	0.00035503	0.0247134	-0.031737
BMP6	-0.520533	4.84305	-2.82831	0.00526072	0.0965051	-2.20704
COX7B2	-0.519497	3.7327	-2.34413	0.020265	0.185342	-3.44789
SNORD116-2	-0.518882	3.69621	-2.54843	0.011735	0.14267	-3.03359
RNU6-704P	-0.518686	3.92588	-2.90164	0.00422017	0.0858222	-2.03966
PHLDB2	-0.518364	5.29957	-3.08463	0.00239086	0.0645686	-1.57233
EMCN	-0.518047	5.45522	-3.57828	0.000454513	0.0280582	-0.17021
SETBP1	-0.517676	5.03956	-2.55857	0.0114111	0.140679	-2.82691
PDZK1	-0.517246	4.61278	-2.19301	0.0297088	0.222035	-3.5369
HGD	-0.516302	5.70723	-2.16426	0.0318845	0.228907	-3.77489
RNA5SP294	-0.515608	3.60876	-4.17311	4.85e-05	0.00876564	1.69702
THBD	-0.515495	6.19372	-3.75587	0.000239314	0.0204096	0.333176
FOSB	-0.515104	5.92316	-2.18701	0.0301517	0.223248	-3.80051
FOXA2	-0.515006	6.14606	-2.29269	0.023131	0.197008	-3.66483
PTGDR2	-0.514849	4.48634	-2.93945	0.00376062	0.081111	-1.94582
C1GALT1C1L	-0.5142	4.30345	-2.54102	0.011977	0.144507	-2.84891
HMCN2	-0.512615	4.4569	-2.77489	0.00616066	0.104151	-2.33231
IGHVIII-67-2	-0.51245	4.06969	-2.08174	0.0389133	0.249838	-3.77243
MACROH2A2	-0.512119	5.81682	-2.86623	0.00469649	0.0903646	-2.20976
TAL1	-0.511822	4.21474	-4.63101	7.35e-06	0.00321083	3.15174
RGL3	-0.51173	4.97961	-2.03222	0.0437379	0.262229	-3.85772
TAC3	-0.511577	4.49266	-2.21039	0.0284565	0.217667	-3.50303
BNIP5	-0.509948	5.86582	-2.33878	0.0205477	0.186116	-3.46572
PRSS3P4	-0.509846	3.59247	-4.49808	1.29e-05	0.00431569	2.915
SERPINF2	-0.509794	4.85374	-2.50572	0.0131911	0.152075	-2.92877
SNHG18	-0.509174	5.58771	-2.6027	0.0100931	0.132626	-2.80412
SEMA3G	-0.50896	5.25843	-3.14099	0.00199653	0.0592703	-1.42156
BICC1	-0.50786	5.4217	-2.88902	0.00438464	0.0878369	-2.08552
RNU6-53P	-0.507485	3.75782	-3.7644	0.000231925	0.0203355	0.415038
TDRP	-0.507324	4.65921	-2.94189	0.00373258	0.0808324	-1.93846
PIEZO2	-0.507196	4.46503	-3.63226	0.000374914	0.0255415	-0.1078
MIR7156	-0.50664	3.64328	-3.72635	0.000266672	0.0213733	0.216606
DCHS1	-0.506032	5.7876	-3.59673	0.000425667	0.0271736	-0.121136
RBP5	-0.506006	5.43606	-3.76009	0.000235633	0.0203999	0.392491
ZBTB16	-0.50552	4.38031	-2.11299	0.0361086	0.241905	-3.68262
MIR7973-1	-0.505445	3.63315	-2.95259	0.00361197	0.0799609	-2.1557
HHIP-AS1	-0.505365	4.43401	-2.86381	0.00473088	0.0907416	-2.1258
BVES	-0.505311	4.81156	-2.30514	0.0224063	0.19407	-3.33417
FHL5	-0.504117	4.76501	-2.88765	0.00440282	0.0878369	-2.06687
RCAN2	-0.503727	5.89112	-2.83228	0.00519899	0.0959123	-2.31394
CCDC8	-0.502585	5.01377	-2.24861	0.0258635	0.208372	-3.46306
SALL2	-0.502503	4.69843	-2.31677	0.0217481	0.191324	-3.30548
ADAMTS9	-0.502166	5.39501	-3.55351	0.000496146	0.0297672	-0.247372
EFEMP1	-0.501552	6.32235	-2.64716	0.00890508	0.125086	-2.92221
RASD2	-0.501094	5.27747	-2.85055	0.00492285	0.0926469	-2.16777
AOC1	-0.501034	6.60433	-2.48163	0.014082	0.156394	-3.45389
RET	-0.499357	4.37622	-2.09024	0.0381322	0.247535	-3.72311
PKLR	-0.499277	3.81127	-2.38218	0.018351	0.177421	-3.29788
C1QTNF2	-0.498722	4.52488	-3.2502	0.00139839	0.0502519	-1.16279
GPR15	-0.498481	4.19659	-2.34035	0.0204642	0.185925	-3.26616
ACVRL1	-0.498016	5.92781	-5.61999	7.99e-08	0.000172472	7.61646
CX3CR1	-0.497752	4.45353	-2.64945	0.00884761	0.124941	-2.6135
PDGFD	-0.497696	5.46193	-2.95936	0.00353762	0.0791529	-1.91066
EDIL3	-0.497565	6.02584	-3.96629	0.000108683	0.0139893	1.07129
IRAK3	-0.49742	5.28363	-2.67344	0.00826379	0.121148	-2.59147
ERG	-0.497332	5.2321	-3.5941	0.000429682	0.0272008	-0.137632
LINC01996	-0.497277	4.00324	-2.19265	0.0297348	0.22217	-3.58207
RNU6-737P	-0.497145	3.61877	-2.98162	0.00330259	0.0764849	-2.12872
COL21A1	-0.496321	4.1101	-3.13058	0.00206449	0.0602154	-1.45569
CCL22	-0.495762	5.33881	-2.53413	0.0122057	0.145882	-2.91515
NRXN2	-0.495513	4.37526	-2.43039	0.0161562	0.166618	-3.07705
CADPS	-0.495506	4.06092	-2.4182	0.0166881	0.169741	-3.12286
PDE7B	-0.495493	4.67201	-2.59139	0.0104172	0.134945	-2.7406
OLFM1	-0.49537	4.96343	-2.51292	0.0129351	0.150605	-2.91992
SOWAHA	-0.495183	5.42077	-2.13051	0.0346143	0.237113	-3.76329
PDE3A	-0.494767	5.33802	-2.5069	0.013149	0.151829	-2.97523
IGHV4-39	-0.494601	6.86107	-2.29612	0.0229292	0.196541	-4.02282
MCOLN3	-0.49404	4.40348	-2.50885	0.0130794	0.151239	-2.91484
IGHV3-15	-0.494026	6.74125	-2.38585	0.0181748	0.176733	-3.74963
CPE	-0.493778	6.09456	-3.12561	0.00209768	0.0605966	-1.58024
THSD7B	-0.49371	3.88611	-3.3236	0.00109512	0.0444012	-0.9194
ADAMTS1	-0.493625	5.94098	-2.94959	0.00364552	0.0802433	-2.02127
TRHDE	-0.493278	3.90041	-3.28083	0.00126337	0.0480703	-1.03985
HAS1	-0.493078	4.10377	-2.57813	0.0108092	0.136959	-2.77828
ATOH8	-0.492976	4.46142	-2.804	0.00565422	0.0998052	-2.26541
SNORD116-19	-0.492565	3.49796	-4.05144	7.83e-05	0.0113858	0.978882
SERPINA1	-0.492477	6.87138	-2.87359	0.00459362	0.0893033	-2.61569
CELP	-0.491623	3.86535	-2.28193	0.0237735	0.200186	-3.45973
MATN3	-0.491229	5.06208	-2.17683	0.0309171	0.225892	-3.60667
IGLV3-17	-0.491022	3.54938	-3.92134	0.000128985	0.0150332	0.686196
FOXF2	-0.490674	6.08527	-3.25321	0.00138453	0.0500899	-1.21088
LEFTY2	-0.48977	3.94656	-2.90198	0.00421585	0.0857952	-2.03646
TMEM59L	-0.489584	4.15491	-2.5753	0.0108945	0.137366	-2.78108
UBE2V2P1	-0.489285	3.89093	-2.58265	0.0106741	0.136439	-2.80574
S1PR1	-0.489272	6.2167	-3.88814	0.000146243	0.0163455	0.774161
MYH11	-0.489199	6.46114	-1.98076	0.0492837	0.277204	-4.43654
APBB1	-0.489124	5.42391	-2.82764	0.00527126	0.0965051	-2.23875
MIR3170	-0.489123	3.75451	-3.16101	0.00187166	0.0572463	-1.40617
PDE1C	-0.488159	4.14491	-3.40021	0.000844863	0.0391483	-0.734142
GPC6	-0.487943	5.60452	-2.61642	0.00971218	0.130253	-2.77559
ROBO2	-0.487357	4.10597	-3.47466	0.000653824	0.0340763	-0.519075
LINC00574	-0.487009	3.94352	-3.67905	0.000316738	0.0231454	0.116869
CLEC2L	-0.486824	3.96353	-2.29191	0.0231768	0.197251	-3.40053
LRRN4CL	-0.486589	5.0004	-2.51995	0.0126891	0.148715	-2.90757
PLAC9	-0.486122	5.57784	-3.21845	0.00155238	0.0525661	-1.22504
ANGPT1	-0.485815	4.58728	-3.225	0.00151936	0.0520143	-1.22803
GRID1	-0.485604	4.29695	-2.98345	0.0032839	0.0763186	-1.83604
PODN	-0.485599	6.11987	-2.39089	0.017936	0.175574	-3.44063
RNU6-858P	-0.485431	3.78877	-3.33727	0.00104592	0.0435343	-0.889414
IL34	-0.485361	5.27936	-3.02549	0.00288098	0.0709411	-1.72625
RNA5SP37	-0.485233	4.73238	-2.32623	0.021225	0.189475	-3.28805
RNY4P17	-0.485065	3.96766	-2.84628	0.00498603	0.0933673	-2.17076
EFR3B	-0.484602	4.18398	-3.58366	0.000445928	0.0276698	-0.219984
FAM124B	-0.484582	4.38258	-3.3839	0.000893183	0.0402467	-0.802371
AVPR2	-0.48454	4.2465	-3.01705	0.002958	0.0720624	-1.75129
CLEC10A	-0.48414	4.89922	-2.13029	0.0346328	0.237161	-3.672
CRISP2	-0.484129	3.69896	-2.4601	0.0149228	0.160541	-3.23438
GNAZ	-0.484094	5.25529	-2.36878	0.0190061	0.180521	-3.25682
TTYH2	-0.483902	5.06913	-2.95603	0.00357406	0.0795523	-1.89774
NYNRIN	-0.48382	5.90742	-3.72734	0.000265705	0.0213557	0.284045
MYOM3	-0.483811	4.48001	-2.02779	0.0441933	0.26363	-3.8286
SOBP	-0.48361	5.0945	-2.50832	0.0130981	0.151425	-2.94085
CLDN5	-0.483467	5.7695	-2.99929	0.00312639	0.0742734	-1.85111
PROS1	-0.482678	5.94492	-3.58269	0.000447465	0.02769	-0.183202
RAB37	-0.482635	4.70326	-3.14948	0.00194266	0.0586035	-1.41926
HDC	-0.482529	4.2522	-2.89745	0.00427414	0.0862793	-2.0435
COLCA2	-0.482351	5.74153	-2.67955	0.00812083	0.120178	-2.65629
RNU6-272P	-0.482077	3.82176	-3.02654	0.00287153	0.0708608	-1.73899
SLC10A2	-0.481917	3.64381	-2.98748	0.00324315	0.0757807	-2.04388
ZC3H12C	-0.481875	5.0234	-3.42438	0.000777752	0.0372964	-0.653125
LIFR	-0.481696	5.1104	-2.21986	0.0277939	0.2159	-3.53186
CYYR1	-0.481048	5.78588	-3.4947	0.000609809	0.0329839	-0.43622
CDH13	-0.481032	5.12574	-3.35557	0.000983267	0.0420227	-0.837848
PTPRM	-0.480912	5.7253	-3.9989	9.59e-05	0.0130046	1.1933
CDHR5	-0.480186	6.39216	-2.30404	0.0224695	0.194346	-3.74801
BCL2L10	-0.479809	4.50718	-2.11522	0.0359155	0.241289	-3.67612
ARID3A	-0.479793	5.66832	-2.68635	0.00796421	0.11884	-2.62403
ZNF727	-0.479775	3.92603	-3.18711	0.00171968	0.0550394	-1.29746
ZNF415	-0.478918	4.73179	-2.70742	0.00749637	0.115257	-2.48533
CERS4	-0.478668	5.43626	-2.43399	0.0160019	0.165871	-3.15131
NRXN3	-0.478203	4.38418	-2.03	0.0439662	0.262851	-3.8273
BDKRB2	-0.478032	5.44804	-3.3607	0.000966347	0.0418623	-0.814145
FBN2	-0.47779	4.35503	-2.96199	0.00350905	0.0789034	-1.89013
FRAS1	-0.477568	4.91545	-2.04207	0.0427397	0.259614	-3.83161
APOLD1	-0.477348	5.74479	-3.74722	0.000247045	0.0207903	0.359309
P2RY14	-0.477227	5.13836	-2.30314	0.0225214	0.19445	-3.37252
CASTOR2	-0.476745	5.69848	-3.37854	0.000909623	0.0404832	-0.776016
IGHV1-18	-0.475854	6.86229	-2.31602	0.0217896	0.191512	-3.97948
LINC02588	-0.475494	3.69862	-3.25427	0.00137967	0.0500518	-1.1864
PAPPA	-0.475336	4.81954	-2.70585	0.00753022	0.115551	-2.48974
F2R	-0.474659	6.58131	-5.98827	1.29e-08	5.68e-05	9.43345
BOC	-0.474219	5.06224	-1.98415	0.0489009	0.276468	-3.9547
DLL1	-0.473174	5.69626	-4.38924	2.03e-05	0.00555566	2.56749
NR2F1	-0.472876	5.95546	-2.64823	0.00887831	0.124983	-2.78899
PNMA3	-0.472392	3.89168	-2.55444	0.0115421	0.141472	-2.86806
RNY4P36	-0.472079	4.10901	-2.6081	0.00994159	0.131542	-2.71187
SRPX	-0.471033	5.62753	-2.30824	0.0222292	0.193209	-3.46112
MIR591	-0.47063	3.58335	-4.38324	2.08e-05	0.0056214	2.46357
SERPINA10	-0.470578	3.7242	-3.02707	0.00286677	0.0708044	-1.80046
IGHV5-51	-0.470119	6.91642	-2.40391	0.0173312	0.172486	-3.81594
PCDHB2	-0.469775	4.56519	-2.32815	0.0211199	0.188904	-3.27934
CGNL1	-0.468621	4.97432	-2.32725	0.0211691	0.189259	-3.30417
PALM	-0.468505	5.56142	-2.35871	0.0195118	0.182375	-3.33879
PNLDC1	-0.468262	3.76105	-2.27318	0.0243075	0.202398	-3.54661
ACACB	-0.4682	5.29506	-3.27776	0.00127637	0.0482303	-1.04845
GDF10	-0.468146	3.94147	-2.70515	0.00754546	0.115701	-2.51091
PLEKHA4	-0.468014	6.22458	-3.90458	0.000137437	0.0157614	0.828566
DNAH12	-0.467722	3.65084	-5.26408	4.34e-07	0.000579647	6.1258
FGF7	-0.467071	5.32966	-2.0798	0.0390928	0.250084	-3.83725
CD36	-0.466856	4.93004	-2.37675	0.0186138	0.17856	-3.20065
GFAP	-0.466628	3.58978	-4.76785	4.07e-06	0.00241517	3.98533
PKDCC	-0.46588	6.40117	-2.98022	0.00331696	0.0765871	-2.08977
ACKR3	-0.465706	6.15632	-4.49464	1.31e-05	0.00432767	2.98291
GALNTL6	-0.465644	3.63786	-3.93116	0.000124265	0.0147641	0.886396
GCM1	-0.46527	3.59258	-5.95192	1.55e-08	6.33e-05	9.25607
MIR99AHG	-0.46507	4.18726	-2.64571	0.00894187	0.125357	-2.62489
AMPH	-0.464893	4.32447	-3.51413	0.000569804	0.0320941	-0.437669
RNU6-534P	-0.464756	3.73604	-3.34226	0.00102849	0.0433135	-0.898929
RNY3P11	-0.464431	3.94565	-2.05343	0.0416127	0.256747	-3.85789
CRMP1	-0.464344	5.17285	-3.06371	0.00255463	0.0667236	-1.6244
SNORD48	-0.464042	3.67134	-3.0033	0.00308757	0.0737487	-1.93556
GDNF	-0.463951	4.09954	-3.61473	0.000399194	0.0264675	-0.113172
RNA5SP283	-0.463705	5.48085	-2.37267	0.0188137	0.179559	-3.29141
FAM13C	-0.46331	4.40485	-2.97371	0.0033844	0.0774248	-1.86252
ERICH4	-0.463032	4.03968	-2.0302	0.0439454	0.262837	-3.87072
LHX6	-0.462254	4.68397	-3.08462	0.00239089	0.0645686	-1.58537
MIR3117	-0.462238	3.99214	-2.40416	0.0173195	0.172429	-3.16415
METTL7A	-0.461997	6.41348	-4.11405	6.13e-05	0.00999138	1.52419
THRB	-0.461431	5.21514	-2.33661	0.0206636	0.186779	-3.31658
PLEKHB1	-0.46137	5.97362	-2.41758	0.0167155	0.169838	-3.32903
NHSL2	-0.460996	4.59183	-2.42097	0.016566	0.168985	-3.09555
HDGFL3	-0.460935	4.95159	-2.8087	0.00557614	0.0989152	-2.25401
MIR604	-0.460666	4.2216	-2.24172	0.0263154	0.210354	-3.45459
EPDR1	-0.460627	5.66375	-2.6545	0.0087217	0.123906	-2.69914
MIR10B	-0.460567	3.94692	-2.50084	0.0133676	0.152995	-2.9693
FILIP1	-0.460384	4.89717	-2.26891	0.024572	0.203585	-3.41118
RPRM	-0.459394	4.05512	-2.08161	0.0389249	0.249838	-3.77684
LINGO3	-0.459156	4.54922	-2.25821	0.0252453	0.205657	-3.41336
ADCY1	-0.458357	4.23623	-2.84008	0.00507935	0.0945886	-2.17965
LINC00648	-0.458257	3.6733	-3.19626	0.0016692	0.0544281	-1.38216
RAMP3	-0.458041	6.11031	-3.30576	0.00116258	0.0459779	-1.06289
EFCC1	-0.457589	5.17869	-3.27579	0.00128475	0.0483693	-1.05666
ITGB3	-0.457392	4.78679	-2.8207	0.00538117	0.0971584	-2.22514
ALPL	-0.457125	5.52835	-2.75483	0.00653326	0.107461	-2.43204
FGD5	-0.457112	5.5779	-3.2785	0.00127322	0.0482147	-1.05549
KIRREL1	-0.456536	6.02168	-4.20578	4.26e-05	0.00818477	1.91582
ADAMTS15	-0.45626	4.68425	-2.21957	0.0278143	0.21597	-3.49037
MCC	-0.455553	5.12414	-2.93897	0.00376614	0.0811144	-1.94116
ROBO4	-0.455453	5.56781	-3.54476	0.000511697	0.030134	-0.271127
RNU7-47P	-0.455346	3.87618	-2.3315	0.0209382	0.188131	-3.35023
SEMA5A	-0.455262	5.31424	-2.93209	0.00384627	0.0821908	-1.96734
LINC00242	-0.453943	4.24689	-3.39067	0.00087282	0.0397043	-0.773617
ZNF366	-0.453908	4.6386	-3.23461	0.0014721	0.0514439	-1.2012
CDH6	-0.453625	4.76597	-3.45908	0.000690096	0.0351974	-0.584099
CDKN2B	-0.453424	5.8843	-2.9086	0.00413192	0.0851699	-2.11591
ADCYAP1	-0.453414	3.98922	-2.49662	0.0135217	0.153746	-2.96954
NPFFR2	-0.453197	3.69007	-3.13867	0.0020115	0.0594578	-1.52224
RAPGEF4	-0.452496	4.78034	-3.5533	0.000496519	0.0297672	-0.31589
MIR595	-0.452362	3.67937	-2.64867	0.00886716	0.124983	-2.85218
ABCC4	-0.452354	5.66058	-3.55398	0.000495327	0.0297672	-0.245686
FHL1	-0.452071	6.15867	-2.33704	0.0206407	0.186719	-3.57438
PEG3	-0.451941	4.143	-2.41991	0.0166124	0.169277	-3.11003
RNU6-999P	-0.451607	3.57809	-3.76289	0.000233219	0.0203946	0.1618
HOXD1	-0.451467	4.0017	-3.33982	0.00103697	0.0434201	-0.883324
BANF2	-0.451348	3.58583	-3.10529	0.00223863	0.0625877	-1.84941
CACNA2D1	-0.451084	5.20299	-2.42057	0.0165832	0.169056	-3.14081
RNY3P2	-0.45088	3.5863	-3.15786	0.0018908	0.0576469	-1.6937
C3orf86	-0.450586	4.49086	-2.22367	0.0275309	0.214956	-3.47809
LAMC3	-0.450565	4.59094	-2.29273	0.0231288	0.197008	-3.34821
TMEM130	-0.450421	4.33745	-2.17728	0.0308828	0.225738	-3.56738
FXYD6	-0.449763	5.4438	-2.26517	0.0248058	0.204367	-3.50497
FBLN5	-0.449757	6.14272	-2.97189	0.0034035	0.0775354	-2.01887
MYCT1	-0.449611	5.40638	-3.62799	0.000380695	0.0257819	-0.0207227
TNFAIP8L3	-0.449444	4.89162	-2.4603	0.0149145	0.160522	-3.02615
SLC23A1	-0.449284	4.30709	-2.65874	0.00861717	0.123405	-2.59362
LDB2	-0.449216	5.30672	-3.1802	0.00175878	0.0555452	-1.31665
HCN4	-0.449186	3.7151	-2.91941	0.00399819	0.0835169	-2.09732
KRT42P	-0.449083	3.62153	-2.96148	0.00351456	0.0789343	-2.17799
MIR4472-2	-0.448485	3.64513	-3.04963	0.00267063	0.068185	-1.86928
FAM171B	-0.448396	5.0593	-3.20791	0.00160689	0.0534973	-1.24623
STXBP1	-0.447642	5.96119	-3.58393	0.00044549	0.0276698	-0.181741
CDH5	-0.447302	6.14262	-4.20337	4.3e-05	0.00820781	1.89738
RNA5SP296	-0.446705	3.8722	-2.76765	0.00629279	0.105419	-2.37865
FAM198B-AS1	-0.446581	4.42179	-2.59095	0.01043	0.134945	-2.74053
MLIP	-0.445625	3.54599	-4.08315	6.92e-05	0.010612	1.23022
MMRN2	-0.445192	5.9418	-3.47926	0.000643472	0.0338139	-0.504173
FAM110B	-0.445001	4.71659	-2.53578	0.0121506	0.14562	-2.8602
PTGDS	-0.443957	6.30005	-2.18035	0.0306509	0.225019	-3.96554
CDO1	-0.44373	4.35434	-2.22188	0.0276541	0.215235	-3.4839
LGI2	-0.443583	5.02576	-2.13942	0.0338751	0.234865	-3.67123
SDK2	-0.443565	4.42663	-2.19401	0.0296356	0.221777	-3.53337
SRGAP3-AS2	-0.443405	3.49878	-4.55493	1.02e-05	0.00379798	2.90473
MIR26A1	-0.44297	3.60728	-4.19538	4.44e-05	0.00836196	1.7772
HEYL	-0.44234	6.0697	-2.88972	0.00437534	0.0878271	-2.21545
SEMA3D	-0.442195	4.17023	-2.53826	0.0120683	0.145118	-2.85979
CA1	-0.442187	4.02626	-1.98822	0.048444	0.275436	-3.94766
RNU6-1208P	-0.442156	3.92634	-2.62345	0.00952202	0.128911	-2.70139
RNU6-910P	-0.442038	3.681	-3.00472	0.00307393	0.0734789	-1.91351
LINC01239	-0.441915	3.923	-2.28349	0.0236796	0.199834	-3.42938
SMIM10	-0.440858	5.36835	-2.60667	0.00998168	0.131787	-2.75644
HNF4A	-0.440804	6.45577	-2.46128	0.0148754	0.160393	-3.42722
CD93	-0.440724	6.35288	-4.23361	3.81e-05	0.00769871	1.97498
IGFBP2	-0.440551	6.62498	-2.73657	0.00688995	0.110217	-2.84011
CAMK1D	-0.440473	5.41807	-2.87716	0.0045445	0.0888195	-2.11509
PAK3	-0.440459	4.02102	-2.93936	0.00376173	0.081111	-1.93923
C20orf194	-0.440386	5.38552	-2.89909	0.00425291	0.0860902	-2.05664
LINC02593	-0.440176	4.20427	-2.90512	0.00417576	0.085442	-2.02421
SYNPO	-0.439875	6.41778	-4.08804	6.79e-05	0.0105242	1.4293
FAM162B	-0.439111	4.87258	-2.92714	0.00390494	0.0827963	-1.96997
PIPOX	-0.438968	4.60493	-2.03209	0.0437511	0.262229	-3.82264
PPP1R16B	-0.438583	5.46985	-2.26538	0.0247923	0.204315	-3.51057
RHOJ	-0.438568	5.73617	-3.09892	0.00228453	0.0631874	-1.57609
HTR4	-0.438455	3.50456	-5.60875	8.44e-08	0.000172472	7.52696
OR8G5	-0.438085	3.52111	-3.49719	0.000604534	0.0329839	-0.797831
ISLR2	-0.437927	4.33145	-2.57879	0.0107894	0.136959	-2.76752
PLAT	-0.437591	6.27829	-4.74927	4.42e-06	0.00249878	3.97447
HSPA12B	-0.437519	5.43292	-3.25678	0.00136828	0.0498732	-1.10879
ABCA9	-0.43737	4.17587	-2.52766	0.0124242	0.147355	-2.88198
RNU4-38P	-0.436647	4.23779	-2.04686	0.0422609	0.258378	-3.80754
RNU6-135P	-0.435975	3.85999	-2.74141	0.00679383	0.109424	-2.44397
MOCS1	-0.435845	5.25649	-2.90068	0.00423248	0.0858628	-2.04233
PDE9A	-0.435521	4.86583	-2.11174	0.0362172	0.242179	-3.70179
TREML2	-0.435233	4.28342	-2.19355	0.0296688	0.221938	-3.54039
SMO	-0.435052	5.53391	-2.24981	0.0257853	0.208066	-3.55711
CDK5R2	-0.435036	4.10513	-2.13709	0.0340672	0.235302	-3.66438
C3	-0.434943	6.9498	-3.19479	0.00167722	0.0545025	-1.75131
ZNF813	-0.434347	4.72358	-2.18324	0.030433	0.224293	-3.55919
SEMA6D	-0.434315	4.60224	-2.57572	0.0108817	0.137284	-2.77343
HTR2A	-0.434307	4.03887	-3.11277	0.00218578	0.0617445	-1.49828
SYT11	-0.433866	5.75444	-2.90678	0.0041548	0.0853113	-2.09171
MIR5707	-0.433303	3.66541	-2.09971	0.0372789	0.24549	-4.09184
TMEM88	-0.43323	5.73263	-3.33954	0.00103797	0.0434201	-0.894234
SLC38A11	-0.433056	4.4325	-1.98181	0.0491648	0.277056	-3.90652
NKX1-2	-0.432609	3.53789	-3.34543	0.00101754	0.0430741	-1.33444
DPPA3P2	-0.431695	3.47281	-4.03746	8.26e-05	0.0117626	0.85826
HUNK	-0.431673	4.56912	-2.20929	0.0285343	0.217767	-3.5051
MIR628	-0.43156	3.56471	-3.0793	0.0024316	0.0650775	-1.9597
RIPOR3	-0.431341	4.64108	-3.61154	0.00040377	0.0264675	-0.164058
PCDH17	-0.429256	5.49168	-3.23531	0.00146874	0.0513755	-1.17164
SORBS1	-0.429197	6.05164	-2.29947	0.0227339	0.195752	-3.61421
MIR2278	-0.429022	3.79824	-2.79653	0.00578051	0.100831	-2.33838
ADAMTS18	-0.42901	3.83396	-3.45787	0.000692983	0.0352555	-0.530898
PDK4	-0.428962	6.20044	-2.1218	0.0353504	0.239619	-4.03991
GRB10	-0.428825	5.82747	-4.74502	4.5e-06	0.00249878	3.93427
TMTC1	-0.427514	5.00369	-2.12778	0.0348435	0.238011	-3.68955
RAMP2-AS1	-0.427437	4.01351	-3.34412	0.00102206	0.0432289	-0.87281
MIR4506	-0.427382	3.79236	-2.45735	0.0150333	0.161195	-3.13342
HEG1	-0.427219	6.20481	-3.77263	0.000224998	0.0201183	0.385978
ZNF134	-0.427163	5.37191	-2.58036	0.0107423	0.136804	-2.81687
TCEAL7	-0.427111	4.95901	-2.31678	0.0217473	0.191324	-3.32334
RNU7-200P	-0.426942	3.73675	-2.78302	0.00601531	0.103168	-2.42102
ALDH1A3	-0.426907	5.58264	-2.40889	0.0171042	0.171668	-3.23685
SLC6A3	-0.42597	3.58977	-3.44423	0.00072641	0.0357378	-0.816366
TRIL	-0.425951	5.1259	-2.4127	0.0169329	0.170733	-3.14713
PRG4	-0.425944	4.16877	-2.27955	0.0239177	0.200731	-3.38697
CCL14	-0.425929	4.11609	-2.85171	0.00490569	0.0924376	-2.15161
ARHGEF15	-0.425736	5.31906	-3.00178	0.00310228	0.0739469	-1.78963
CAND2	-0.425722	4.61679	-2.00598	0.0464952	0.269945	-3.86803
PTGFR	-0.425122	4.44836	-2.35041	0.0199376	0.184172	-3.23532
TMEM119	-0.425118	6.01629	-2.63472	0.00922413	0.127418	-2.84101
CABYR	-0.424893	4.48234	-2.91216	0.00408739	0.0846274	-2.01189
LINC02475	-0.423774	3.72176	-2.81065	0.00554409	0.0986795	-2.36776
BMF	-0.423289	5.83694	-3.89406	0.000143011	0.0161102	0.838978
PRSS12	-0.422827	5.49557	-1.98486	0.0488211	0.276397	-4.05149
RNU5D-1	-0.422237	4.38509	-2.1195	0.035547	0.240195	-3.66949
RELN	-0.421982	3.91096	-2.64841	0.00887371	0.124983	-2.64892
TMPRSS2	-0.42198	6.50123	-2.85409	0.00487092	0.0921612	-2.47427
KIF12	-0.421814	5.91107	-2.26184	0.025015	0.20495	-3.6433
CD34	-0.421776	6.03536	-3.52089	0.000556466	0.0315916	-0.391993
EBF4	-0.421577	5.53495	-2.40692	0.0171937	0.171938	-3.23031
PLPP7	-0.421204	4.66988	-2.48955	0.0137832	0.155053	-2.95612
RNU6-720P	-0.421047	4.08711	-2.46429	0.0147556	0.159898	-3.02325
RNU6ATAC42P	-0.420908	3.77115	-2.58408	0.0106316	0.136161	-2.86747
KDR	-0.420837	5.86225	-3.03728	0.00277645	0.0697856	-1.76799
TIMP4	-0.420192	4.77305	-2.07507	0.0395354	0.251381	-3.75826
RN7SL846P	-0.419355	3.60668	-5.4059	2.23e-07	0.000363779	6.73632
RGS5	-0.4188	6.81443	-4.29958	2.92e-05	0.00663561	2.07524
DAAM2	-0.418368	5.41639	-2.17082	0.0313766	0.226946	-3.68516
C4orf19	-0.418227	5.95747	-2.49362	0.013632	0.1545	-3.15346
ROBO1	-0.418173	5.73094	-3.43424	0.000751854	0.0364007	-0.613813
NPY4R2	-0.418171	3.67444	-3.7647	0.000231667	0.0203355	0.366683
VN1R48P	-0.417617	3.51168	-4.48238	1.38e-05	0.00449622	2.65942
ZNF835	-0.417569	4.06698	-3.00663	0.00305578	0.0732545	-1.77115
MYOZ3	-0.417392	3.81964	-4.06792	7.34e-05	0.0108546	1.40984
S100B	-0.417073	5.14055	-2.08763	0.0383707	0.248312	-3.78489
EBF3	-0.416809	4.44917	-2.76336	0.00637237	0.105885	-2.35876
RSPO1	-0.416802	4.02612	-2.25042	0.0257457	0.208066	-3.46544
JAM3	-0.41632	5.81649	-2.66206	0.00853631	0.122769	-2.71728
P2RY6	-0.416268	5.31084	-2.60835	0.00993458	0.131542	-2.74458
CDH19	-0.416243	3.9806	-2.04229	0.0427173	0.259592	-3.86648
SERP2	-0.415181	4.61075	-2.32349	0.0213753	0.189941	-3.28896
RNU6-251P	-0.415035	3.64226	-3.37993	0.000905337	0.0404038	-0.910946
RNU6-863P	-0.414822	3.69988	-2.98831	0.00323481	0.0756807	-1.93774
NLRP7	-0.414613	3.87342	-2.48746	0.0138615	0.155385	-3.01947
TRPC6	-0.41447	4.6005	-3.34173	0.00103031	0.0433215	-0.918424
CCNJL	-0.414153	4.50922	-2.76734	0.00629852	0.105453	-2.34974
FGF9	-0.413988	4.01814	-2.35459	0.0197219	0.183186	-3.26039
SEMA6C	-0.413891	5.1686	-2.90897	0.0041273	0.0851439	-2.01722
ESPNL	-0.413857	4.06041	-2.4259	0.0163502	0.16777	-3.10673
ARHGAP23	-0.413332	6.09365	-3.40506	0.000830988	0.0388514	-0.76137
IGLV1-40	-0.413277	6.9948	-2.23588	0.0267032	0.211722	-4.24252
PCDHB7	-0.413227	4.36446	-2.64446	0.00897356	0.125494	-2.62463
STXBP6	-0.412661	5.1166	-2.10343	0.036948	0.244478	-3.75182
ATP1B2	-0.412129	4.80791	-2.12564	0.0350244	0.238517	-3.67095
SGSM1	-0.412075	4.4861	-2.68306	0.00803962	0.119452	-2.53927
PBX1	-0.412041	5.52487	-2.66313	0.00851018	0.122548	-2.6511
CLU	-0.411735	6.7256	-2.66479	0.00847013	0.122351	-3.0754
LINC00654	-0.411577	4.49557	-2.59071	0.010437	0.134945	-2.74082
PRSS3P1	-0.411371	3.56621	-3.45087	0.000709961	0.0354502	-0.884733
MIR634	-0.410863	3.66277	-2.68164	0.00807233	0.119769	-2.7887
TBX4	-0.410194	3.73374	-2.74603	0.006703	0.108706	-2.52184
MIR4670	-0.41006	3.76301	-2.76543	0.00633392	0.10571	-2.44078
ANKRD65	-0.409927	5.06962	-2.06876	0.0401318	0.252955	-3.80683
JCHAIN	-0.409457	7.05402	-2.38256	0.0183324	0.177325	-3.95928
THSD4	-0.409247	5.03394	-2.32322	0.0213897	0.19004	-3.31868
GPRIN2	-0.409175	5.62204	-2.0632	0.0406628	0.254101	-3.94406
DYDC2	-0.40907	3.66292	-3.49517	0.000608806	0.0329839	-0.520136
DCHS2	-0.409052	3.91221	-2.78839	0.00592086	0.102303	-2.31812
ACOX2	-0.408677	4.96179	-2.06363	0.0406216	0.254062	-3.79959
PAX4	-0.408594	3.6328	-2.52694	0.0124486	0.147369	-3.23405
ZNF43	-0.408559	4.93441	-2.17833	0.0308032	0.225389	-3.58699
CHIC1	-0.408169	4.97743	-2.31441	0.0218802	0.191845	-3.32987
GHR	-0.40762	4.40497	-2.191	0.0298567	0.222489	-3.53952
CCM2L	-0.407531	4.94296	-2.82762	0.00527164	0.0965051	-2.2091
CYGB	-0.407358	6.3094	-4.33794	2.5e-05	0.00619643	2.3714
CASC20	-0.407094	3.67663	-3.6798	0.000315879	0.0231454	0.101352
DLC1	-0.406365	5.67779	-2.99015	0.0032164	0.0754661	-1.85957
CEBPA-DT	-0.406364	5.10311	-2.07502	0.0395394	0.251381	-3.80122
NEURL1B	-0.40632	5.94744	-3.12172	0.00212405	0.0609889	-1.55426
SSX1	-0.406188	3.67085	-2.18326	0.0304318	0.224293	-3.89366
TSPAN33	-0.405999	5.97356	-3.51957	0.000559053	0.0316384	-0.385297
ADGRL2	-0.405853	5.86481	-2.66935	0.00836084	0.121528	-2.71263
HPGDS	-0.405678	4.54361	-2.30425	0.0224575	0.194293	-3.3251
HNF4A-AS1	-0.405592	4.54511	-2.41223	0.016954	0.170835	-3.11204
PRND	-0.405316	4.16364	-2.35577	0.0196617	0.182984	-3.23764
CYP2A7	-0.405193	3.58741	-4.47818	1.4e-05	0.00453112	2.8092
SDK1	-0.405128	4.93226	-2.11872	0.0356142	0.240479	-3.69661
GPR160	-0.405057	6.33724	-3.30066	0.0011826	0.0463848	-1.14692
CENPE	0.305008	5.56841	2.20007	0.0291944	0.220532	-3.66669
FNDC11	0.305107	4.12846	1.99595	0.0475874	0.273188	-3.9085
RNU6-545P	0.305144	3.60924	2.49885	0.0134399	0.153464	-3.39314
HAPLN2	0.305156	3.68185	3.63789	0.000367413	0.025309	-0.0291468
SNHG20	0.305163	5.08502	3.28968	0.00122672	0.0473047	-1.02309
PLS3-AS1	0.305298	4.00448	2.74955	0.00663458	0.108199	-2.39736
ETV2	0.305327	4.58715	2.48226	0.0140577	0.15639	-2.96913
PPFIA4	0.305468	3.77128	3.65321	0.000347717	0.0243854	0.0617021
ERCC6L	0.305669	5.12184	2.0421	0.0427363	0.259614	-3.86387
CHAF1B	0.305764	5.47681	2.57547	0.0108893	0.137349	-2.84617
RPL22L1	0.305787	6.5194	2.81243	0.00551488	0.0985001	-2.5949
RNU7-26P	0.305818	3.68507	2.13959	0.033861	0.234865	-3.93908
TFAP4	0.306012	5.51098	3.04298	0.0027271	0.0691299	-1.69767
RRP7BP	0.306123	5.06455	3.46124	0.000684953	0.0350287	-0.54403
DEFB131B	0.306137	4.22849	2.14563	0.0333677	0.233524	-3.63052
MIR124-3	0.30628	3.45935	4.32868	2.6e-05	0.00624228	1.90229
IRF9	0.306319	5.37123	2.93085	0.00386095	0.0822893	-1.97533
CLSPN	0.306353	5.5665	2.19905	0.0292682	0.220651	-3.66827
MARK2P11	0.30658	3.49161	2.62676	0.00943361	0.128555	-3.50021
INE1	0.306654	4.96341	2.70755	0.00749346	0.115243	-2.48929
TBL1X	0.307239	5.94223	2.22446	0.0274767	0.214747	-3.73335
DPY19L2P2	0.308489	4.38358	2.19623	0.0294732	0.221256	-3.52849
FBXO48	0.308547	4.91386	3.42193	0.000784338	0.0374519	-0.672334
CENPU	0.308556	5.94156	2.49446	0.013601	0.154309	-3.14791
FGF11	0.308719	3.64792	4.16304	5.05e-05	0.00906163	1.73854
GMPSP1	0.308768	5.01009	2.06254	0.040727	0.254326	-3.80844
SPAG4	0.308804	5.51314	2.04407	0.042539	0.259175	-3.95007
RPS17P2	0.309076	5.1321	2.0722	0.0398056	0.252177	-3.81168
RPL31P28	0.309079	4.08601	2.29421	0.0230415	0.196849	-3.36705
UQCC2	0.309505	5.88655	3.86027	0.000162403	0.017147	0.723063
STAC3	0.309694	5.01323	2.42157	0.0165395	0.168858	-3.1162
PTK6	0.309769	6.30375	2.07647	0.0394034	0.250935	-4.17921
POLB	0.309919	5.69204	3.75554	0.00023961	0.0204096	0.387245
PSMC3IP	0.309927	5.09763	3.01373	0.00298886	0.0724718	-1.75252
MHENCR	0.30999	5.67252	3.06046	0.00258104	0.0669692	-1.67155
MIR23C	0.310111	3.55773	2.36082	0.0194048	0.181993	-3.91249
LINC00896	0.310171	4.09177	2.03449	0.0435063	0.261632	-3.84879
RN7SL525P	0.310277	3.5532	4.69778	5.52e-06	0.00281024	3.61105
ETV7	0.31072	5.99707	2.36478	0.0192055	0.181183	-3.45583
RN7SL454P	0.311167	3.78702	2.81466	0.00547846	0.098156	-2.29635
KIFC2	0.311392	5.76914	2.62573	0.00946106	0.128588	-2.79304
RN7SL716P	0.311439	3.72864	2.84291	0.00503657	0.0940803	-2.27434
RN7SL47P	0.311788	3.72446	2.53773	0.0120858	0.145176	-3.02544
JARID2-AS1	0.311799	4.07774	2.77823	0.0061006	0.103779	-2.32589
CENPS	0.311922	5.26493	2.74382	0.00674619	0.109025	-2.42476
NPIPB5	0.31208	4.69633	2.78051	0.00605973	0.103571	-2.31907
RPL34P31	0.312196	4.92783	2.21835	0.0278987	0.216127	-3.51063
CTH	0.312412	5.3898	2.06229	0.0407503	0.254387	-3.88454
TCAF2	0.312441	4.44885	2.20957	0.0285147	0.217723	-3.50251
CYP51A1	0.312447	5.41709	2.14793	0.0331816	0.233084	-3.73037
RNA5SP450	0.312761	3.80307	2.13952	0.0338669	0.234865	-3.77648
CCAT2	0.312992	3.51723	2.7653	0.00633634	0.105715	-3.07801
LINC01402	0.313654	3.73459	2.78254	0.00602375	0.103177	-2.42069
OLMALINC	0.313691	5.40995	2.68445	0.00800773	0.119325	-2.58277
SETD9	0.313715	5.27997	2.4811	0.0141019	0.156394	-3.02311
LINC00634	0.313994	3.81404	3.33377	0.00105831	0.0437498	-0.895209
RPL3P2	0.31406	5.39562	2.94262	0.0037243	0.080791	-1.94757
RPL5P23	0.31408	4.74209	3.42199	0.00078416	0.0374519	-0.691426
LINS1	0.314204	5.34584	3.9438	0.000118425	0.0144594	0.972663
RAD54B	0.314581	4.6725	2.56394	0.0112431	0.139718	-2.79894
PLK4	0.314635	5.61041	2.45227	0.0152394	0.16241	-3.15011
RNU6-182P	0.314646	3.788	2.17466	0.0310822	0.226106	-3.72739
C21orf58	0.314712	4.96799	2.55498	0.0115249	0.141377	-2.82946
C12orf54	0.314881	3.59221	3.09868	0.00228633	0.0632065	-1.87817
MTBP	0.315118	4.8556	2.52529	0.0125051	0.147744	-2.88685
CBY3	0.315183	3.91349	3.47752	0.000647359	0.0338937	-0.480426
FANCB	0.315256	4.624	2.14096	0.0337485	0.234814	-3.63011
SMIM19	0.315279	5.92603	3.68488	0.000310119	0.0229798	0.143987
SNHG21	0.315372	4.63501	2.74252	0.0067719	0.109225	-2.40601
CRYBB3	0.315424	4.24132	2.41063	0.017026	0.171206	-3.12018
HNRNPA3P5	0.315503	4.70994	2.67663	0.00818886	0.120715	-2.55391
SLC24A2	0.315566	3.66742	3.22474	0.00152064	0.0520143	-1.30017
MIR563	0.315913	3.76423	2.01117	0.0459381	0.268585	-4.06648
SNORA58B	0.315921	3.8784	2.22987	0.0271077	0.213438	-3.55349
ZEB1-AS1	0.316236	5.10359	2.92056	0.00398416	0.0833671	-1.98645
DDN-AS1	0.316638	4.15144	2.62439	0.00949681	0.128806	-2.67254
TRBV10-1	0.3167	3.68486	2.64199	0.00903665	0.126037	-2.8284
RNA5SP150	0.316929	3.76605	2.10336	0.036954	0.244478	-3.88818
COX20	0.317061	5.09459	3.53676	0.000526311	0.0306066	-0.322311
E4F1	0.317165	5.7989	5.29476	3.76e-07	0.000538619	6.1654
RPS4XP6	0.317169	5.12262	2.65155	0.00879497	0.124486	-2.62636
CMC1	0.317178	5.13922	3.84522	0.000171821	0.0175583	0.620036
RNU4-36P	0.317629	3.76121	2.49054	0.0137463	0.154801	-3.08593
MIR1827	0.31763	3.76726	2.04896	0.0420526	0.257711	-3.98742
TTF2	0.317698	5.60817	3.54969	0.000502881	0.029866	-0.257085
RNA5SP371	0.317929	3.69283	2.52201	0.0126178	0.148299	-3.10686
MIR4633	0.318028	3.58589	2.56368	0.0112511	0.139756	-3.31699
MIR664A	0.318196	3.58238	3.01227	0.00300249	0.0726206	-2.14443
SYNE2	0.318458	6.00772	3.24959	0.00140118	0.0502719	-1.20468
CCDC183	0.318569	4.24418	2.90285	0.00420475	0.0856607	-2.03114
MIR7107	0.318627	3.75174	2.08835	0.0383049	0.248108	-3.9278
CCNF	0.318703	5.79487	2.48046	0.0141264	0.156575	-3.13539
ANKMY1	0.318982	4.91544	3.51659	0.000564914	0.0319129	-0.404206
MIR6747	0.319314	3.74114	2.01962	0.0450443	0.26593	-4.07765
PPIAP76	0.319522	3.79227	3.20465	0.00162406	0.0536905	-1.26472
RPL5P5	0.319623	4.32711	3.01132	0.00301137	0.0727185	-1.77011
ELOBP1	0.319754	4.43845	2.27644	0.0241074	0.201771	-3.37708
SFI1	0.320115	5.42476	3.53734	0.000525228	0.0306066	-0.294664
CSPG5	0.320204	4.03373	2.13236	0.0344598	0.236564	-3.68577
ADGRF2	0.320516	3.5761	3.26759	0.00132018	0.0489136	-1.43569
ANKRD31	0.320684	3.61772	3.72076	0.00027217	0.0214974	0.13095
SEC31B	0.320695	4.4844	2.46872	0.0145808	0.159133	-2.99641
RN7SL472P	0.320787	3.7266	3.03598	0.00278778	0.0698177	-1.76828
RNU2-27P	0.32146	5.2929	2.59603	0.0102832	0.133916	-2.77044
FAM161A	0.321506	4.71353	3.18714	0.00171955	0.0550394	-1.32304
STPG3-AS1	0.32157	3.76104	3.27796	0.00127552	0.0482303	-1.0709
KRT75	0.321625	3.50002	2.38543	0.0181951	0.176788	-4.05614
CSKMT	0.321707	5.07663	3.14631	0.00196262	0.0586798	-1.40926
DUSP2	0.321781	5.83517	2.33179	0.0209224	0.188048	-3.47292
MIR6891	0.321926	3.50573	3.31432	0.00112977	0.0451799	-1.5407
XKRX	0.322078	4.09498	2.16821	0.0315776	0.227647	-3.60671
PTGR2	0.322138	4.99517	3.26112	0.00134878	0.0495412	-1.10688
CHTF18	0.32215	5.63145	2.52469	0.0125257	0.147945	-2.99353
EIF4A2P4	0.322193	4.13853	2.85313	0.00488487	0.0922631	-2.14817
CCER2	0.322312	3.88963	3.10256	0.0022582	0.062854	-1.52502
RGS16	0.322384	5.91669	2.28627	0.0235122	0.199011	-3.5958
RBFA	0.322534	5.60885	3.98802	0.0001	0.0133386	1.15057
H2BC20P	0.322582	5.33841	2.94821	0.00366101	0.0802554	-1.9285
GOLGA2P5	0.322721	4.62711	2.45069	0.015304	0.162604	-3.03461
RN7SL263P	0.322951	4.00526	2.73578	0.00690584	0.110389	-2.42954
SNORA33	0.322989	6.00723	2.26072	0.0250859	0.205133	-3.68133
AUNIP	0.32307	5.18057	2.19313	0.0296998	0.222035	-3.595
ZNF367	0.323114	5.77524	2.94502	0.00369698	0.0805449	-1.99723
CACNA1F	0.32313	3.86387	3.15373	0.00191621	0.0582181	-1.39105
RPS4XP17	0.323278	4.65842	3.05477	0.00262773	0.0677361	-1.66243
RN7SL535P	0.323553	4.22639	2.28414	0.0236404	0.19958	-3.37125
RAD51B	0.32359	4.53534	3.84305	0.000173221	0.0176383	0.508149
KLHL28	0.323731	5.42885	3.86302	0.000160734	0.0170919	0.72142
RABL2B	0.324019	5.43222	4.28468	3.1e-05	0.00685791	2.14492
SNORD38A	0.324091	3.61269	2.92542	0.00392546	0.0829363	-2.25036
LINC00677	0.324359	3.72957	3.53693	0.000525986	0.0306066	-0.311846
HAUS8	0.324537	5.1687	3.75258	0.000242225	0.0205357	0.336579
MBLAC1	0.324601	4.80077	2.8247	0.00531752	0.0968431	-2.21576
WDR90	0.324822	5.7174	2.97339	0.0033877	0.0774402	-1.91138
SPHK1	0.32496	5.72422	2.41374	0.0168863	0.170663	-3.26363
ESRG	0.325005	3.47822	4.65472	6.64e-06	0.00304024	3.22907
DDX11-AS1	0.325245	4.12066	2.84861	0.00495143	0.0929323	-2.15892
RPL15P18	0.325601	4.99779	2.63258	0.00928019	0.127722	-2.66043
STAG3L5P	0.325875	5.19387	2.80991	0.00555629	0.0987467	-2.26088
FBF1	0.326593	4.18518	4.00444	9.39e-05	0.0128744	1.04972
RPL21P120	0.326773	4.72712	2.40461	0.0172989	0.172429	-3.13109
RNU1-61P	0.326834	3.63905	2.44758	0.0154318	0.163356	-3.37605
HSD17B1	0.327017	4.40936	2.72507	0.00712376	0.112101	-2.44552
H4C13	0.327177	4.00781	1.99863	0.0472943	0.272307	-3.9324
IGFLR1	0.327193	4.79154	2.57476	0.0109108	0.137441	-2.77838
RNA5SP132	0.327473	3.74136	2.59362	0.0103525	0.13446	-2.87183
NME1-NME2	0.327833	4.00665	2.8228	0.00534766	0.0970584	-2.22384
CHCHD6	0.328714	5.44733	3.69968	0.000293896	0.0222918	0.203767
RPL18AP15	0.329055	4.18234	2.66751	0.00840481	0.12192	-2.57583
CDC6	0.329157	5.89592	2.03482	0.0434727	0.261567	-4.08925
RPL17P33	0.329249	4.13702	2.94171	0.00373468	0.0808324	-1.93428
ERMN	0.329429	4.00478	2.72484	0.00712853	0.112101	-2.455
SMCR2	0.329599	3.54143	5.77149	3.81e-08	0.000114639	8.34187
SCAT2	0.329846	4.66204	2.24103	0.0263611	0.210548	-3.44737
SPTLC1P5	0.330136	3.55117	3.72774	0.000265318	0.0213557	-0.0291393
IZUMO4	0.330256	4.29769	2.50155	0.0133416	0.152924	-2.93103
CCDC160	0.330463	3.8322	2.56176	0.0113111	0.140141	-2.87927
BOLA2-SMG1P6	0.33055	4.78543	2.44117	0.0156987	0.164822	-3.05927
C9orf40	0.330633	5.58127	2.98561	0.00326203	0.0759853	-1.85755
NCBP2-AS1	0.330683	4.17282	3.12116	0.00212784	0.0610365	-1.48581
C2CD4D	0.330824	5.20801	2.14605	0.0333331	0.233421	-3.68941
TEDC1	0.331095	5.20027	2.78735	0.00593912	0.102587	-2.31551
ANKS3	0.33135	5.14015	4.08433	6.89e-05	0.0106094	1.39059
LINC01213	0.33169	3.60872	3.11445	0.00217404	0.0616959	-1.78621
TH	0.331831	3.79783	2.07403	0.0396326	0.251694	-3.90799
PDK1	0.331875	5.23059	3.0916	0.00233841	0.0639358	-1.55222
NPIPB3	0.331896	4.61045	2.7186	0.00725823	0.113084	-2.45998
MINCR	0.332119	5.40003	2.5857	0.0105837	0.135982	-2.80959
TRAIP	0.332145	5.20622	2.46102	0.0148858	0.160425	-3.05579
ZGRF1	0.332229	4.70438	2.92903	0.00388252	0.08249	-1.96933
RPS20P33	0.332436	4.75284	2.61255	0.00981837	0.130941	-2.69551
TRIM74	0.332484	3.68922	3.59106	0.000434343	0.027284	-0.166186
MTND4P6	0.332512	3.67477	2.58371	0.0106427	0.136189	-2.98832
LINC01561	0.332545	3.58288	3.92511	0.000127149	0.0148495	0.741171
FANCM	0.332678	4.82708	3.23124	0.00148854	0.0517402	-1.19962
SMTNL1	0.332692	4.29239	2.34251	0.0203501	0.185656	-3.25352
BCAN	0.332826	4.40052	2.08547	0.0385683	0.248912	-3.72745
LINC01962	0.33297	3.66334	2.98735	0.0032445	0.0757807	-1.96948
ZBED8	0.333361	4.95649	3.14298	0.00198383	0.0590363	-1.423
GUCA1A	0.333456	3.7635	2.76331	0.00637331	0.105885	-2.44565
RMI2	0.333508	5.95299	3.10173	0.00226423	0.062878	-1.61233
PRKX	0.333877	5.87443	2.88643	0.00441913	0.0880667	-2.17243
RNY3	0.33393	3.61104	2.51204	0.012966	0.15067	-3.35843
ZCWPW1	0.334107	4.69827	2.82241	0.00535384	0.0971189	-2.22206
AK7	0.334278	4.70363	2.06075	0.0408999	0.254877	-3.7768
LINC00106	0.334445	5.18778	2.1647	0.0318501	0.228799	-3.65044
RHEBL1	0.334602	4.7847	2.36678	0.0191056	0.18082	-3.2098
FOXD4	0.334876	4.06385	2.27974	0.0239065	0.200731	-3.39955
LINC00893	0.334988	4.3014	3.22074	0.00154076	0.0523062	-1.23694
B3GLCT	0.335089	5.44433	3.33196	0.00106481	0.0438379	-0.896629
TNNT2	0.335314	3.80537	2.8248	0.00531597	0.0968431	-2.26666
MTHFD2L	0.335756	4.89598	3.16817	0.00182878	0.0566481	-1.36063
PPP1R27	0.335947	3.68934	3.03118	0.00283001	0.0703826	-1.82201
HAMP	0.336496	4.09849	1.98808	0.0484597	0.275442	-3.92793
CBWD1	0.337005	4.70753	2.70445	0.00756076	0.115843	-2.49178
C8orf37	0.337108	5.06047	3.22651	0.00151183	0.0519304	-1.19619
HSD3B7	0.337281	6.26074	3.50092	0.00059673	0.0328667	-0.509552
RPL9P18	0.337504	4.63881	2.62504	0.0094796	0.128756	-2.66689
ESCO2	0.338076	5.27494	2.15335	0.032746	0.231634	-3.68873
ACOT4	0.338159	5.16557	2.18773	0.0300984	0.223106	-3.60272
AATBC	0.338429	4.04413	2.57314	0.01096	0.137712	-2.79329
RAD54L	0.338632	5.49266	2.29519	0.0229842	0.196753	-3.45608
ZNF37CP	0.338643	3.71271	3.18381	0.00173823	0.0554163	-1.37068
H3C13	0.339192	4.22011	2.11626	0.0358254	0.241137	-3.68463
ZNF280C	0.339412	5.27613	3.50616	0.000585894	0.0326211	-0.394768
SERHL2	0.340362	4.70283	3.49631	0.000606388	0.0329839	-0.488367
DENND6B	0.340637	5.22751	3.16083	0.00187272	0.0572481	-1.36825
ACER1	0.340705	3.65874	2.07237	0.0397892	0.252149	-4.15444
TRAJ50	0.340907	3.48292	3.36428	0.000954726	0.0416511	-1.4398
CMC2	0.341176	5.22549	3.88708	0.000146826	0.0163786	0.768805
SPATC1	0.3413	4.08048	3.23043	0.00149251	0.0517637	-1.19157
CHRNA5	0.341302	4.89867	2.20667	0.0287203	0.218686	-3.52953
H2BC15	0.34139	4.35596	2.45454	0.0151469	0.161776	-3.02685
MIR5006	0.341604	3.73561	2.57526	0.0108955	0.137366	-2.92056
NPIPA3	0.34167	3.82051	4.19255	4.49e-05	0.00837414	1.83801
RNF227	0.3429	5.10255	3.31323	0.00113388	0.0453126	-0.957115
TBC1D24	0.343013	5.37409	3.58261	0.000447581	0.02769	-0.16047
TEC	0.343159	4.80109	3.17181	0.00180733	0.0563194	-1.35728
TRAPPC5	0.343175	4.64425	3.83248	0.000180199	0.0180073	0.485187
AP3M2	0.343251	5.57179	4.17986	4.73e-05	0.00866656	1.80356
MIRLET7A1	0.343265	3.64408	2.06147	0.0408303	0.254636	-4.23209
RPSAP17	0.343898	4.4772	2.85908	0.00479844	0.0913795	-2.13807
RNU6-1143P	0.344102	3.83026	2.32558	0.0212602	0.189507	-3.39044
EEF1B2P6	0.344114	5.16859	2.67005	0.00834405	0.121528	-2.588
LINC01909	0.344241	4.27938	2.54256	0.0119264	0.14417	-2.84521
POLE2	0.344349	5.56355	3.05914	0.00259175	0.0671414	-1.66041
MIR302C	0.344389	3.87026	2.00652	0.0464368	0.269758	-3.97545
RUNX2	0.344451	5.22631	2.54907	0.0117143	0.142599	-2.8669
LINC01979	0.344688	4.21438	2.09926	0.0373184	0.245611	-3.71597
ARAP2	0.34473	5.38572	2.71963	0.00723675	0.112953	-2.49616
HES5	0.344778	4.01324	2.21592	0.0280676	0.216615	-3.53328
IL36B	0.344909	3.53176	3.21483	0.00157089	0.0528177	-1.75382
KLRC1	0.345295	3.97978	2.75309	0.00656644	0.107609	-2.39163
SLC22A2	0.34538	3.51365	4.15457	5.22e-05	0.00919759	1.37166
NPIPB4	0.345432	4.53624	2.93918	0.0037638	0.0811144	-1.94789
HFE	0.345556	5.35022	2.9486	0.00365661	0.0802433	-1.92841
SNORD127	0.345632	3.9341	2.08188	0.0389	0.249807	-3.80811
SUMO2P19	0.345955	3.98378	2.93754	0.00378273	0.0812577	-1.94454
SNRNP25	0.346403	5.96349	4.76664	4.09e-06	0.00241517	4.03863
CALM1P1	0.346904	3.76226	3.50877	0.00058059	0.0324486	-0.387357
LINC01588	0.347757	4.11902	3.73446	0.000258874	0.0211936	0.234994
CEP83	0.347812	5.18724	3.88319	0.000148997	0.0164287	0.749246
H4C2	0.348213	4.3166	2.34395	0.0202742	0.185396	-3.2498
S100A7A	0.348328	3.58416	2.23332	0.0268751	0.212249	-4.07675
DUS4L	0.348402	5.16902	3.96605	0.000108784	0.0139893	1.01119
CEP78	0.348457	5.30972	3.71673	0.000276204	0.0216257	0.244813
RASSF1-AS1	0.348668	4.11954	3.3832	0.000895324	0.0402715	-0.78046
LINC01011	0.348798	4.8865	3.59655	0.000425951	0.0271736	-0.177521
FAM86B3P	0.349314	4.60917	2.54606	0.0118118	0.143236	-2.83609
AP1S3	0.349343	5.77622	2.88513	0.00443651	0.0881235	-2.15323
RPS15AP40	0.349555	4.4012	2.40315	0.0173657	0.172651	-3.13006
RPL7P16	0.349591	4.11672	3.04883	0.00267744	0.0683099	-1.66681
ANKRD22	0.349637	6.33311	2.19593	0.0294947	0.221359	-3.95263
DHRS4L2	0.350073	5.79347	4.20981	4.19e-05	0.00814076	1.93029
FAM86B1	0.350541	4.27554	2.33258	0.0208799	0.187844	-3.27394
TDH	0.350682	3.59374	3.36585	0.000949638	0.0415376	-1.0765
ZBTB25	0.351071	5.20366	4.51679	1.19e-05	0.00406147	2.90035
RPSAP15	0.35121	4.93651	2.58441	0.0106217	0.136104	-2.76347
GGACT	0.351212	5.30746	2.76793	0.00628775	0.105385	-2.37154
BCL2L2-PABPN1	0.351273	4.05458	3.25479	0.0013773	0.0500346	-1.1233
KRT18P11	0.351597	4.70594	2.09503	0.0376981	0.246591	-3.71669
RNF222	0.351767	3.55808	2.21837	0.0278971	0.216127	-4.22141
RWDD3	0.351968	5.25274	5.17642	6.52e-07	0.000811086	5.42083
LIPE-AS1	0.352232	4.26631	3.60494	0.000413403	0.0267515	-0.176113
RIN1	0.352405	5.76553	2.43427	0.01599	0.165871	-3.22996
RN7SL333P	0.35252	4.15126	2.82072	0.00538079	0.0971584	-2.22491
LINC01694	0.352645	3.86321	2.02643	0.0443343	0.264031	-3.94608
RN7SL356P	0.352879	3.58932	4.06855	7.32e-05	0.0108546	1.26994
ACBD3-AS1	0.352959	4.83516	2.7779	0.00610641	0.103809	-2.32483
ISG20	0.352977	5.80227	2.39002	0.0179771	0.175886	-3.33758
FALEC	0.353009	4.03069	2.77545	0.00615052	0.1041	-2.3347
TRBV11-1	0.353065	3.67817	2.94683	0.00367655	0.0803894	-2.07375
RPS2P35	0.353154	4.51306	2.80899	0.00557135	0.0988914	-2.25453
TRIM59	0.353361	5.14087	3.10041	0.00227373	0.0629495	-1.52867
FAM72D	0.35345	4.39105	2.31586	0.0217986	0.191519	-3.30238
RAB3A	0.353843	5.29236	2.79211	0.00585632	0.101741	-2.31178
LINC02490	0.35409	3.55695	3.26699	0.00132283	0.0489651	-1.48845
ASNS	0.35412	6.06915	3.7565	0.00023876	0.0204096	0.357323
RDM1	0.354239	4.56096	2.27236	0.0243584	0.202591	-3.3853
ATG16L2	0.354505	5.28415	3.59386	0.000430049	0.0272008	-0.133108
CHKB-DT	0.354556	5.04781	2.72115	0.00720497	0.112777	-2.46179
DCAF12L2	0.355162	3.68201	2.50618	0.0131747	0.152003	-3.18215
PAM16	0.355396	5.62725	4.87218	2.58e-06	0.00183328	4.38548
OSCAR	0.355483	5.27392	2.20318	0.0289704	0.219613	-3.59288
RNA5-8SN1	0.35585	3.59817	2.38386	0.0182703	0.177089	-3.681
CCDC114	0.355875	3.82085	3.08302	0.00240311	0.0646851	-1.59313
POLQ	0.355979	5.14723	2.15247	0.0328164	0.23185	-3.66632
SPDYE16	0.35612	3.75993	4.14003	5.53e-05	0.00943723	1.67958
ULBP1	0.356234	4.05003	2.0509	0.0418614	0.257416	-3.82925
MIR4435-1	0.356584	3.59188	3.20529	0.00162069	0.0536413	-1.56765
EGLN3	0.356597	5.61284	2.45119	0.0152836	0.162547	-3.15306
SNORA24B	0.356638	4.00529	2.43869	0.0158026	0.165274	-3.08716
SAMD10	0.357629	6.09187	3.66723	0.000330574	0.0236334	0.061394
RPSAP5	0.357707	4.09417	3.54391	0.000513229	0.0301391	-0.321222
LMNTD2	0.357733	5.02383	2.40428	0.0173143	0.172429	-3.15303
SNORD82	0.357981	3.70386	2.30719	0.022289	0.193523	-3.55906
GCHFR	0.358679	5.20467	2.32181	0.0214676	0.19037	-3.34535
SNORA51	0.358688	3.96282	2.17367	0.0311582	0.22626	-3.62747
LMF1	0.358902	5.18455	2.70883	0.00746589	0.115106	-2.49969
LINC00671	0.359989	3.59095	2.8612	0.00476809	0.0911656	-2.54079
KIF27	0.360091	4.82042	3.76899	0.000228034	0.0202028	0.321852
EIF1P4	0.360685	3.85361	2.58333	0.0106537	0.136284	-2.81543
RPS15AP24	0.361181	5.26867	2.86075	0.00477456	0.0912324	-2.1423
RNU6-925P	0.361248	5.02703	2.18666	0.0301781	0.223383	-3.58312
MIR6880	0.361696	3.65925	2.63416	0.00923893	0.127522	-2.8892
RPL10AP2	0.361803	5.28667	2.97248	0.00339725	0.0775164	-1.86314
MIR3199-1	0.361806	3.50739	3.79312	0.000208584	0.0192834	0.0403559
TYMSOS	0.361901	5.22005	2.17044	0.0314057	0.227008	-3.64545
ACTBP1	0.362068	4.4822	2.77338	0.00618802	0.104432	-2.33624
FAM86C2P	0.3623	4.98621	2.82205	0.00535961	0.0971378	-2.22296
IL20RA	0.363106	5.50114	1.97558	0.0498733	0.278416	-4.07056
MCM10	0.363194	5.28964	2.14465	0.033447	0.233847	-3.70817
HES7	0.363236	3.62931	3.22068	0.00154105	0.0523062	-1.38519
CCDC18	0.364722	5.01669	3.67379	0.000322824	0.0233256	0.071812
RPS6KL1	0.364895	4.76491	2.81718	0.00543771	0.0977626	-2.23361
SLC12A9-AS1	0.3649	5.12226	2.38118	0.0183993	0.177562	-3.21216
SETD6	0.365136	5.35987	3.47084	0.000662542	0.0342808	-0.494391
POLR3K	0.365383	6.04383	4.99722	1.47e-06	0.00129799	4.97906
PINX1	0.365525	5.10374	3.09806	0.00229084	0.06327	-1.53521
BEGAIN	0.365656	4.1054	2.44542	0.0155213	0.163856	-3.05964
CSPG4P12	0.365717	3.59698	3.69319	0.00030091	0.0226094	-0.0132404
RNU1-35P	0.366208	3.45895	2.87795	0.00453372	0.0887476	-2.93608
KRT18P17	0.366343	4.42727	2.49016	0.0137607	0.154861	-2.95264
LURAP1L-AS1	0.366761	3.86892	3.03399	0.00280524	0.0700558	-1.7096
PERM1	0.367252	4.43911	2.2461	0.0260275	0.209192	-3.43474
GNB1L	0.367723	4.73054	3.2499	0.00139976	0.0502525	-1.15737
EME2	0.367778	5.14795	3.30172	0.00117842	0.0462843	-0.986346
TRAJ48	0.367925	3.68943	2.45161	0.0152664	0.162536	-3.27424
SHCBP1	0.367946	5.47496	2.73607	0.00689997	0.110326	-2.46964
PSMG4	0.368092	5.11203	4.6085	8.09e-06	0.00338573	3.1938
OASL	0.368184	5.94359	2.1007	0.0371898	0.245348	-3.98064
CRTAM	0.368531	4.3015	2.09326	0.0378578	0.2471	-3.71883
RIBC1	0.368604	4.29179	3.18832	0.00171294	0.0550394	-1.32047
RNA5SP79	0.368818	3.66121	2.78298	0.00601597	0.103168	-2.52639
SREBF1	0.369267	6.50354	2.78256	0.00602332	0.103177	-2.6655
WDHD1	0.369408	5.44011	3.18602	0.00172581	0.0552047	-1.30556
POLR3G	0.369946	4.91343	2.35914	0.0194898	0.182281	-3.23437
NDUFB4P6	0.370841	3.7465	3.83922	0.000175718	0.0178291	0.658798
KLHL2P1	0.37107	3.96169	2.87949	0.00451272	0.0886526	-2.08949
RPL10P3	0.3711	5.56402	2.69897	0.00768097	0.116652	-2.57375
SMN2	0.37116	4.67791	2.25022	0.0257591	0.208066	-3.43089
PAQR4	0.371456	6.16141	2.92244	0.00396141	0.0830689	-2.16008
RPTN	0.371945	3.48705	3.71556	0.000277379	0.0216257	-0.277016
TRGV5P	0.372567	3.6205	4.02744	8.59e-05	0.0120776	1.20096
RNU6-481P	0.372628	4.53818	2.05307	0.0416475	0.256771	-3.78304
UCN	0.372631	4.71058	2.62489	0.00948354	0.128756	-2.66796
RN7SKP30	0.373106	4.21155	3.41579	0.000801012	0.0379753	-0.702949
EME1	0.373195	5.0074	2.48726	0.013869	0.155437	-2.97785
SLC27A5	0.373419	4.60362	2.82148	0.0053687	0.0971477	-2.22512
PMAIP1	0.373754	5.80254	2.97925	0.00332688	0.0766132	-1.91215
HK3	0.373811	4.74611	2.0221	0.0447848	0.265235	-3.84704
KLRD1	0.374154	4.24507	2.58093	0.0107253	0.136674	-2.76414
WASH6P	0.374486	5.17342	3.61391	0.000400368	0.0264675	-0.0845547
CIAO3	0.375046	5.50248	5.07653	1.03e-06	0.000982267	5.15018
MIR155HG	0.375242	4.92958	2.23897	0.0264975	0.211118	-3.47161
TIFA	0.375289	5.472	3.55164	0.000499432	0.0298049	-0.250433
FLNC-AS1	0.375315	3.59404	4.64624	6.89e-06	0.00308691	3.49126
MIR6505	0.375371	3.63416	2.93144	0.00385404	0.0822462	-2.19699
H4C1	0.375411	4.03868	2.34894	0.0200139	0.18455	-3.26655
RNU6-47P	0.377158	3.49473	3.65375	0.000347042	0.0243679	-0.469227
IDH1-AS1	0.377559	4.37226	2.62914	0.00937063	0.128409	-2.65783
RNU6-1138P	0.378147	3.64821	2.87057	0.00463567	0.0897129	-2.35077
LINC01063	0.378645	4.41811	2.43738	0.015858	0.165419	-3.06089
CRIP1	0.379223	5.44819	2.39658	0.0176694	0.174337	-3.23455
H2BC13	0.379881	4.51805	2.23804	0.0265593	0.211256	-3.4497
CELF5	0.379925	3.80075	3.79571	0.000206595	0.0191712	0.516024
BRIP1	0.38022	5.08463	2.83602	0.00514126	0.0954309	-2.1923
RPS4XP20	0.381101	4.12156	3.50662	0.000584959	0.0326211	-0.433472
XRCC3	0.381297	5.41232	4.19546	4.44e-05	0.00836196	1.82988
ELL3	0.381525	4.51503	2.41193	0.0169676	0.170858	-3.11197
TRAJ20	0.381796	3.66001	2.73097	0.00700295	0.111227	-2.65397
HCN3	0.38244	5.28502	2.79571	0.00579448	0.101004	-2.30237
ELOVL3	0.382557	4.07056	2.16211	0.032053	0.229521	-3.6228
DGUOK-AS1	0.382721	5.24736	2.56944	0.0110729	0.138565	-2.82424
RNU6-1336P	0.382776	3.54173	4.04124	8.14e-05	0.0116493	1.01618
RPL17P34	0.382992	4.73763	2.80967	0.00556014	0.0987603	-2.25132
DHODH	0.383547	5.18534	4.56936	9.55e-06	0.0036938	3.08257
C8orf58	0.383679	5.11496	3.55043	0.00050157	0.0298366	-0.27984
SNORA28	0.384005	4.40017	2.33278	0.0208691	0.187844	-3.26934
ANKRD18A	0.384488	4.2835	2.14389	0.033509	0.234003	-3.62965
KLHL17	0.38459	5.41751	3.16258	0.00186217	0.0570315	-1.36848
ALG1L2	0.385453	4.27006	3.01516	0.00297552	0.0722849	-1.75833
H2BC19P	0.386633	4.40895	2.91947	0.00399737	0.0835169	-1.99456
ACBD7	0.386797	4.64313	1.98466	0.0488433	0.276397	-3.90348
CCNE2	0.387012	4.99979	2.90586	0.00416647	0.085442	-2.02112
NSUN5P2	0.387028	4.52576	3.42867	0.000766391	0.0369163	-0.686601
SYPL1P2	0.387048	4.15257	2.79006	0.00589193	0.102019	-2.29677
RPS4XP1	0.387688	4.88479	3.04095	0.00274456	0.0694307	-1.68776
RNU6-583P	0.388047	4.11359	2.10467	0.0368376	0.244074	-3.72011
LINC02303	0.388265	3.61423	2.17017	0.0314265	0.227048	-4.09991
CD2BP2-DT	0.388453	5.49652	3.24313	0.0014314	0.0507831	-1.15025
FAM27E3	0.388457	4.34839	2.74595	0.00670462	0.108706	-2.3982
ARMH1	0.38886	4.21878	3.9086	0.000135363	0.0155861	0.741797
HLA-F-AS1	0.389069	4.41744	2.89715	0.00427797	0.086309	-2.04782
MND1	0.389253	5.48476	2.82536	0.0053072	0.0968154	-2.25295
STAG3L5P-PVRIG2P-PILRB	0.389373	4.48785	3.71052	0.000282528	0.0218933	0.11362
GPT2	0.39088	5.92229	2.92815	0.00389294	0.0826019	-2.07493
ALG1L9P	0.391396	4.30499	3.0207	0.00292441	0.0715487	-1.7459
NPIPB11	0.391889	4.39788	3.60925	0.000407088	0.0265445	-0.177057
NPIPA1	0.391903	4.39635	4.10557	6.34e-05	0.0101276	1.32718
ZNF860	0.392153	4.92152	2.61648	0.0097106	0.130253	-2.69227
MIR924HG	0.392452	4.16055	2.23432	0.0268078	0.211984	-3.47346
SNORD53B	0.392721	4.29579	2.08488	0.0386229	0.249125	-3.73419
POU2F3	0.392925	4.33095	2.1921	0.0297755	0.222198	-3.53876
RNU1-136P	0.393523	3.75289	2.31846	0.0216534	0.191061	-3.47217
RNU1-100P	0.393574	3.73949	3.62519	0.00038454	0.0259097	-0.0324966
MIR4263	0.393847	5.15421	2.09435	0.0377598	0.246784	-3.77537
P2RY11	0.393895	5.45912	3.65537	0.000345027	0.0242562	0.0665661
NUPR1	0.393925	5.94331	2.48184	0.0140739	0.156394	-3.17687
BTN2A2	0.394232	5.21625	3.31196	0.00113873	0.0454043	-0.954866
TMEM187	0.394237	5.82399	4.59681	8.5e-06	0.00350081	3.36133
RNU5A-4P	0.39441	3.50835	3.57008	0.00046792	0.0285167	-0.701078
RPS18P13	0.394432	4.43424	2.87886	0.00452126	0.0887028	-2.09127
MIR3121	0.395094	3.5442	3.3719	0.000930368	0.0410179	-1.23443
H2AC11	0.395251	4.78166	2.34662	0.0201345	0.184914	-3.24985
LINC02310	0.395367	3.47842	4.62612	7.51e-06	0.00325374	3.11199
EEF1G	0.395939	4.81228	3.0649	0.00254504	0.0665642	-1.6304
RPS4XP11	0.39595	5.25321	2.91439	0.0040598	0.0842983	-2.00803
WNT3A	0.396148	3.60791	3.24879	0.0014049	0.0502796	-1.38217
MIR6832	0.396691	4.07931	2.04253	0.0426934	0.259581	-3.838
RNA5SP243	0.396711	3.7057	2.16678	0.0316887	0.228037	-3.85837
MIR132	0.397384	3.67029	3.07346	0.00247707	0.0657177	-1.74008
UHRF1	0.397548	5.83272	3.06701	0.00252811	0.0663031	-1.68171
RTTN	0.397691	5.04199	3.82215	0.000187271	0.0181848	0.528731
KISS1R	0.398252	4.03817	2.06819	0.0401854	0.253027	-3.80149
ZMYND12	0.398699	4.85837	2.59073	0.0104364	0.134945	-2.74611
EIF1P5	0.398899	4.78362	2.95905	0.0035409	0.0791529	-1.89431
LINC02345	0.398907	3.81617	3.64058	0.000363885	0.0252103	0.0234212
PRR7	0.398989	6.10789	3.24892	0.00140431	0.0502796	-1.2311
RN7SL627P	0.399324	3.59258	4.37302	2.17e-05	0.00573756	2.41272
KCTD8	0.399353	3.64496	2.065	0.0404903	0.253706	-4.22221
ZNF839	0.39965	4.75451	4.43241	1.7e-05	0.0050527	2.43787
FCGR1A	0.399817	4.93059	2.01107	0.0459497	0.268592	-3.88716
LINC02205	0.400297	3.53414	3.61682	0.000396224	0.0263962	-0.485853
RN7SL426P	0.400945	3.60161	5.68364	5.86e-08	0.00014581	7.99937
MIR1256	0.40132	3.61884	3.46578	0.000674265	0.0346992	-0.699933
NPM1P39	0.402166	4.77383	3.58922	0.000437204	0.0274035	-0.215024
KIR2DL4	0.402402	4.26528	2.23546	0.0267312	0.211778	-3.46176
RAB40B	0.40294	5.896	3.09276	0.00232985	0.0638864	-1.62423
SNORA9B	0.402942	4.43827	2.51566	0.0128387	0.149817	-2.89957
FGF5	0.403275	3.62649	3.43544	0.000748735	0.0363458	-0.775755
MSH5	0.403374	4.86299	3.03167	0.00282567	0.0703357	-1.71191
NETO2	0.403644	4.98076	2.02711	0.0442634	0.263801	-3.86663
RPS2P55	0.404534	5.57423	3.45609	0.000697262	0.0352878	-0.538279
RPS2P48	0.404798	4.58144	3.15098	0.00193328	0.0584746	-1.42152
KANSL1-AS1	0.404805	5.24343	2.56969	0.0110653	0.138513	-2.8232
REXO5	0.406283	5.0759	3.45672	0.000695745	0.0352878	-0.555754
RNU4-78P	0.406977	4.61903	2.0033	0.0467855	0.270685	-3.87079
CLCNKA	0.407526	3.67379	2.74154	0.0067912	0.109413	-2.61819
DMC1	0.407717	4.0819	3.87663	0.000152721	0.0166783	0.682345
B3GNTL1	0.408221	4.7298	3.86601	0.000158939	0.0170008	0.6002
RNA5SP139	0.408358	3.68934	2.91325	0.00407384	0.0845284	-2.14285
H3C10	0.409247	5.48664	2.1593	0.0322743	0.230261	-3.72513
HS3ST3A1	0.409659	4.68105	2.34033	0.0204652	0.185925	-3.25736
TRIM46	0.409911	4.46858	3.3	0.0011852	0.0464548	-1.03422
LNCTAM34A	0.410249	4.59	2.99081	0.00320982	0.0753425	-1.82185
ZHX1-C8orf76	0.410497	4.39449	4.05451	7.73e-05	0.0113191	1.16611
MIR3942	0.410759	4.07954	2.06762	0.0402396	0.253049	-3.79338
ABCA17P	0.41093	3.71841	3.24149	0.00143915	0.0508783	-1.20159
PNPLA4	0.411128	5.68383	2.69952	0.00766882	0.1165	-2.59652
DCST2	0.411534	4.1336	3.5845	0.000444597	0.0276549	-0.210867
EIF5AL1	0.412749	4.97839	2.714	0.00735536	0.114188	-2.47512
SNORD7	0.412885	4.7078	2.07018	0.039996	0.2526	-3.76089
KCTD13	0.413814	5.75589	5.55953	1.07e-07	0.000211283	7.28307
H2BU1	0.414836	4.22615	2.55279	0.0115948	0.141773	-2.82523
PPM1J	0.415276	4.36753	2.9951	0.00316739	0.0747761	-1.81073
MIR3122	0.415668	3.65467	3.04208	0.00273489	0.069265	-1.83222
RANBP17	0.415989	4.27529	2.53523	0.0121689	0.145712	-2.86106
B3GNT4	0.416049	4.10044	3.44566	0.000722836	0.0356859	-0.602414
RPSAP8	0.41638	4.76111	2.41495	0.0168321	0.170299	-3.11181
H2AC20	0.416658	5.40016	3.00306	0.00308995	0.0737695	-1.79213
HS3ST6	0.417559	3.75832	2.35403	0.0197506	0.183274	-3.39478
LMNTD2-AS1	0.41862	4.63253	2.26425	0.0248632	0.204458	-3.40271
HAUS7	0.418777	4.49564	4.10569	6.33e-05	0.0101276	1.32344
ESRRB	0.418998	3.6696	3.00821	0.00304072	0.0731127	-1.92268
EPOP	0.419468	5.36197	2.18113	0.0305917	0.224811	-3.65367
PVT1	0.419666	5.50932	3.04834	0.0026815	0.0683401	-1.68309
PYY2	0.419904	4.16411	2.79007	0.00589167	0.102019	-2.29667
TXNRD3	0.420964	5.03344	2.98892	0.00322875	0.0756628	-1.81534
TREX2	0.421319	4.11082	3.62738	0.000381528	0.0258077	-0.0807896
AOC2	0.421328	4.18285	3.85567	0.000165227	0.0172227	0.587933
E2F7	0.42142	5.12185	2.50375	0.0132619	0.152548	-2.95367
C9orf116	0.421846	5.07184	2.7267	0.00709013	0.111774	-2.45022
PKD1P5	0.422112	3.92042	3.03517	0.00279485	0.069903	-1.70015
SNORD73B	0.422537	4.45459	2.05748	0.0412164	0.255652	-3.77564
S100A5	0.422781	4.60227	2.48203	0.0140665	0.156394	-2.97008
LNCAROD	0.42327	3.61513	2.66921	0.00836405	0.12154	-2.88302
ST6GALNAC2	0.42337	4.79419	2.31067	0.0220911	0.192505	-3.32133
PDCD1	0.423801	5.04108	2.09641	0.0375744	0.24623	-3.75233
H4C5	0.423858	5.15365	2.45595	0.0150899	0.161468	-3.0597
UTS2B	0.424621	3.63039	2.90481	0.00417969	0.085485	-2.30277
PSME2P2	0.424796	5.45546	3.33403	0.0010574	0.0437498	-0.890955
SLC9A5	0.425309	4.20966	4.66838	6.26e-06	0.00293765	3.27444
KLHL35	0.425793	4.58373	2.11167	0.0362234	0.242183	-3.6819
SMN1	0.427154	5.02869	4.36301	2.26e-05	0.005896	2.29547
RNU6-213P	0.427756	3.7411	3.35057	0.00100003	0.0425901	-0.868808
RN7SL660P	0.428491	3.67864	3.4601	0.000687673	0.035105	-0.601198
KTN1-AS1	0.428644	4.51126	3.60828	0.000408505	0.0265649	-0.182064
VPS9D1-AS1	0.429921	5.88475	2.71235	0.00739054	0.114337	-2.61431
ABHD12B	0.43001	3.80806	2.55768	0.0114392	0.140804	-2.90382
ZDHHC11	0.430057	4.48354	2.34946	0.0199865	0.18445	-3.23611
HSPA4L	0.430713	5.00874	2.06944	0.0400672	0.2528	-3.79598
MIR761	0.431	3.65512	3.14015	0.00200196	0.059329	-1.55597
RNU6-652P	0.432217	4.55906	2.08423	0.0386831	0.249275	-3.72961
LRP8	0.43222	5.18136	2.46373	0.0147778	0.159974	-3.04664
CYP2D7	0.432618	4.35623	3.76426	0.000232046	0.0203355	0.280289
TRAJ10	0.433356	3.9604	2.12895	0.0347453	0.237584	-3.71267
HLA-J	0.433962	5.03218	2.62981	0.00935292	0.128322	-2.66876
RN7SL778P	0.434435	3.6363	4.72807	4.84e-06	0.00263827	3.87763
CPT1B	0.434589	4.3971	3.8697	0.000156753	0.0168615	0.593668
H3C11	0.435231	4.41945	2.20035	0.0291743	0.220429	-3.52081
TMEM191A	0.435618	4.76835	2.75496	0.00653081	0.107461	-2.37748
FASLG	0.436368	4.45851	2.3535	0.0197781	0.18341	-3.22829
SNORD60	0.436384	5.27147	2.5421	0.0119414	0.14429	-2.88816
TMEM52	0.436435	5.46308	2.18486	0.0303118	0.22394	-3.66962
RNU6-1206P	0.436633	4.14045	2.25761	0.0252835	0.205785	-3.43123
MIR548AN	0.438286	3.65806	3.18719	0.00171921	0.0550394	-1.4311
GRIN1	0.440161	4.10801	2.60897	0.00991737	0.131461	-2.70939
MIR33B	0.441397	3.66457	3.38223	0.000898259	0.0402715	-0.842693
THEM5	0.441892	5.05945	2.13921	0.033892	0.234865	-3.67665
ZP3	0.443443	4.98777	2.3566	0.0196193	0.182952	-3.24658
GINS4	0.443781	5.09538	2.97364	0.00338512	0.0774248	-1.85388
MELTF-AS1	0.443843	5.21992	3.14668	0.00196027	0.0586798	-1.40611
LMTK3	0.444125	5.32385	2.51954	0.0127035	0.148786	-2.94565
SNORA13	0.444281	4.37393	2.48432	0.0139798	0.156069	-2.96547
TCAM1P	0.444748	3.93776	2.1379	0.0339996	0.235213	-3.70403
RGS14	0.444965	5.86963	4.51139	1.22e-05	0.00411919	3.04196
RNU6-1267P	0.445833	3.61393	3.9494	0.000115924	0.0143901	0.900136
CCL3	0.445942	5.2878	2.2619	0.0250112	0.20495	-3.48006
HSF4	0.445991	5.05714	3.61277	0.000402003	0.0264675	-0.103632
SNORD37	0.446737	3.95646	2.32972	0.0210347	0.188496	-3.32529
ATG9B	0.44694	4.5085	2.77547	0.00615018	0.1041	-2.33136
ERFL	0.447795	4.63641	2.59271	0.0103791	0.134714	-2.73699
GINS3	0.448061	5.13094	3.68204	0.000313328	0.0231063	0.114862
PILRB	0.448702	4.95962	3.19756	0.00166214	0.0542291	-1.27928
FCHO1	0.449328	5.58839	2.97583	0.00336225	0.0771562	-1.884
LINC02178	0.449847	3.65277	2.68745	0.0079392	0.118686	-2.7991
RNU6-911P	0.449929	3.60813	3.66661	0.000331313	0.0236334	-0.0305493
PKMYT1	0.450555	5.80427	3.04291	0.0027277	0.0691299	-1.74157
RNA5SP145	0.451072	3.74896	3.07532	0.00246247	0.0655313	-1.64492
DNAAF3	0.451681	4.35847	2.527	0.0124468	0.147369	-2.87678
MIR1972-1	0.451774	4.84433	2.18828	0.0300573	0.223106	-3.55878
MIR744	0.452432	3.61474	3.33925	0.00103898	0.0434307	-1.10034
MMP11	0.452844	6.18468	2.03347	0.0436101	0.262008	-4.20741
CD274	0.453104	5.00876	2.37146	0.0188731	0.179885	-3.21865
MIR3133	0.453255	3.95968	2.46714	0.0146429	0.159431	-3.03724
HOXC-AS2	0.453264	4.33184	2.82139	0.0053702	0.0971477	-2.22474
PRR22	0.453281	4.73802	2.95763	0.00355645	0.0793146	-1.89895
FAM166B	0.453567	4.12115	4.21115	4.17e-05	0.00814076	1.7447
GINS2	0.453976	5.75653	3.19229	0.00169092	0.0547399	-1.32052
MIR6829	0.455154	3.49511	3.82962	0.000182128	0.0180493	0.144718
RNU6-670P	0.45552	3.57154	3.89979	0.000139953	0.0159859	0.612365
RNU7-123P	0.455647	4.35478	2.15701	0.0324551	0.230804	-3.60214
HOXC-AS3	0.455843	3.99853	2.47262	0.0144286	0.1581	-3.01779
RN7SL362P	0.456292	3.59393	4.92351	2.05e-06	0.00167656	4.62973
FAM240C	0.456739	3.60346	4.58263	9.03e-06	0.00357399	3.26064
IFITM4P	0.457037	4.23361	2.88529	0.0044344	0.0881235	-2.07268
CCL3L3	0.457103	5.03637	2.06355	0.0406298	0.254062	-3.81083
RNU1-77P	0.459177	3.66131	3.3118	0.00113935	0.0454043	-1.05937
RNF223	0.459681	5.15379	2.06738	0.0402632	0.253057	-3.82433
ICAM5	0.460166	4.04783	3.14483	0.00197203	0.0588688	-1.41519
MREG	0.460248	5.67406	4.31515	2.74e-05	0.0064336	2.29637
ANKRD63	0.460855	3.57846	3.94494	0.000117913	0.014449	0.795203
PAQR6	0.461651	4.88342	3.26304	0.00134023	0.049399	-1.11019
LINC02188	0.461676	3.69338	3.14828	0.00195019	0.0586117	-1.48771
RNU6-335P	0.462092	3.65727	3.83063	0.000181445	0.0180267	0.570048
TRAJ24	0.462188	3.7757	2.65694	0.00866146	0.123575	-2.69493
ALOX12B	0.462342	4.03983	2.41267	0.0169342	0.170733	-3.13635
MICB	0.463002	5.63265	2.91743	0.00402238	0.0837712	-2.04247
ORC6	0.464958	5.32181	3.20677	0.00161288	0.0535151	-1.2445
CD70	0.465387	4.75959	2.29006	0.0232865	0.197714	-3.35936
PPM1N	0.465694	5.18811	2.58526	0.0105968	0.136028	-2.78193
DNASE1L2	0.466368	4.10278	3.80401	0.000200337	0.018856	0.452831
RPL22P13	0.467293	3.96407	3.23613	0.00146477	0.0513623	-1.16572
BEAN1	0.467457	3.98149	3.23263	0.00148174	0.0516406	-1.17638
H2AC17	0.467606	4.8449	2.42455	0.0164091	0.168254	-3.09688
CCDC194	0.468061	3.81827	4.33407	2.54e-05	0.00619643	2.33979
RPS4XP22	0.468181	4.75416	2.17599	0.0309808	0.225964	-3.57437
BRICD5	0.469775	4.73457	4.33547	2.53e-05	0.00619643	2.10609
H2BC14	0.469929	4.44468	2.2665	0.0247225	0.204092	-3.39666
MIR4653	0.471737	5.52954	2.23202	0.0269625	0.212734	-3.59257
MIR210	0.472037	4.57468	2.15515	0.0326026	0.231308	-3.60372
TRAJ7	0.472503	3.83093	2.46417	0.0147604	0.159898	-3.09431
RPS2P4	0.474157	4.96579	3.83658	0.000177458	0.0179016	0.557698
HLA-DRB5	0.474762	6.87389	2.64966	0.00884234	0.124941	-3.20517
RPL31P49	0.475338	5.2008	3.3122	0.00113781	0.0454043	-0.954824
RN7SL508P	0.476393	3.6167	3.3821	0.00089866	0.0402715	-0.967782
RNU6-117P	0.476608	3.65107	2.6447	0.00896747	0.125448	-2.92553
RNY4P18	0.477988	3.58007	4.17888	4.74e-05	0.00867284	1.65528
LAG3	0.480654	5.36764	2.52373	0.0125584	0.148118	-2.94326
LINC00115	0.481384	4.48156	4.44828	1.59e-05	0.0048913	2.45116
PLA2G2F	0.482016	3.93737	2.20257	0.029014	0.219778	-3.58366
SNORD14E	0.482228	5.18208	2.05483	0.0414755	0.256259	-3.85236
GNLY	0.482433	5.33105	2.3772	0.0185919	0.178528	-3.25261
MIR302A	0.485657	4.12345	2.45586	0.0150932	0.161474	-3.03627
LINC02259	0.485821	3.56141	3.45639	0.000696555	0.0352878	-0.894782
LINC02004	0.48729	4.20584	2.5235	0.0125663	0.148119	-2.88877
TMPRSS11D	0.487425	3.68122	2.10016	0.0372387	0.245368	-4.04377
ARHGEF38-IT1	0.487688	4.25047	2.74519	0.00671952	0.108817	-2.39979
TLE6	0.495895	4.35592	3.45332	0.000703965	0.0354275	-0.612253
ATP2A1-AS1	0.497084	4.71826	2.99426	0.00317563	0.0748778	-1.80975
EFNA3	0.49774	5.71295	2.36147	0.0193718	0.181934	-3.37282
CXCL9	0.498271	6.44454	2.32245	0.0214325	0.190184	-3.73642
DMRTA2	0.498819	3.7962	2.51846	0.0127408	0.14904	-3.00335
PPP1R14B-AS1	0.49957	5.39964	2.53595	0.012145	0.14562	-2.92143
RNU6-1136P	0.501261	4.28601	2.70391	0.00757241	0.115928	-2.49303
ANKRD37	0.502108	4.99855	3.23761	0.00145764	0.051206	-1.16992
H2AC13	0.503136	4.89081	2.48805	0.0138392	0.155378	-2.96783
FHIT	0.503892	4.88727	3.77764	0.000220869	0.019995	0.361496
TEDC2	0.504567	5.23017	3.22838	0.00150256	0.0518923	-1.18534
HOXC-AS1	0.504884	4.61925	2.51182	0.0129738	0.15067	-2.90853
IGKV2-4	0.50491	3.67101	2.55992	0.0113689	0.140608	-3.0799
CALB1	0.506069	3.85875	2.30531	0.0223966	0.194045	-3.4177
TNFRSF18	0.507324	5.30827	3.13203	0.00205495	0.0600776	-1.44662
CXCL10	0.508584	6.38528	2.61525	0.00974425	0.130377	-3.03082
AQP4	0.5101	3.54508	3.3915	0.000870351	0.0397043	-1.14181
CERS3	0.510315	3.63068	2.07721	0.0393343	0.25069	-4.24055
SLC18A3	0.510844	3.68907	2.19194	0.0297872	0.222225	-3.85495
SYCN	0.511319	3.55247	4.89874	2.29e-06	0.00173222	4.4421
TRIM7	0.512507	4.60388	2.20372	0.0289312	0.219491	-3.516
RNU6-316P	0.513003	3.59942	3.81525	0.000192138	0.0184785	0.401871
FSCN2	0.513373	4.35076	3.83624	0.000177684	0.0179016	0.499068
IL4I1	0.515341	5.67658	3.053	0.00264248	0.0679641	-1.69203
ASIC3	0.516096	4.29923	3.89258	0.000143811	0.0161685	0.678368
TP73	0.51645	4.55416	2.6523	0.00877623	0.124374	-2.60712
MIR3188	0.517902	4.32984	2.93477	0.00381494	0.0817428	-1.95609
H2AW	0.51841	6.07047	2.61313	0.0098023	0.130776	-2.91249
SYCE2	0.519798	4.41315	3.6024	0.000417156	0.0268227	-0.195256
MIR6813	0.520887	3.77436	3.13195	0.00205542	0.0600776	-1.47765
IVL	0.521235	3.67424	2.09849	0.037388	0.245786	-4.04815
LGI3	0.521361	3.62643	2.76382	0.00636386	0.105866	-2.69132
MIR3153	0.521784	4.57431	2.38748	0.0180972	0.176384	-3.16197
PGPEP1L	0.52229	3.59636	4.31702	2.72e-05	0.00641113	2.21159
MESP1	0.523195	4.53765	2.41732	0.016727	0.169838	-3.10184
SIX1	0.5258	4.37426	2.46692	0.0146515	0.159431	-3.00175
IL36A	0.526521	3.63345	2.02795	0.0441769	0.263615	-4.31807
MIR4761	0.528697	3.76503	3.76264	0.000233433	0.0203946	0.409576
TGFBR3L	0.530842	4.32643	2.63535	0.00920789	0.127321	-2.64478
CCL4L2	0.532019	5.59893	2.45361	0.0151848	0.161969	-3.14401
TM4SF1-AS1	0.532098	4.34866	2.71386	0.00735844	0.114188	-2.47059
LYG1	0.533368	4.60613	3.64768	0.000354715	0.0247134	-0.0626675
SOWAHD	0.5335	4.78943	3.72366	0.000269302	0.0214468	0.182033
CD164L2	0.534863	3.92056	3.73303	0.000260231	0.021225	0.290424
METRN	0.540229	5.8865	3.50198	0.000594511	0.0328368	-0.426503
SNORD83A	0.541631	4.67211	2.8638	0.00473094	0.0907416	-2.12509
TP53AIP1	0.543784	3.60495	3.61343	0.000401055	0.0264675	-0.258525
PAX8	0.546061	5.07121	3.01247	0.00300062	0.0726095	-1.75572
RPL10P13	0.546441	4.77681	3.54587	0.000509702	0.0300703	-0.338002
LINC02582	0.5559	3.66872	2.93441	0.00381908	0.0817624	-2.10257
IGFL3	0.558136	3.73106	3.46591	0.000673978	0.0346992	-0.530908
SNORA69	0.558638	3.76181	3.97417	0.000105453	0.0138409	1.10983
LIPM	0.559214	4.82157	2.93194	0.00384807	0.0821955	-1.95924
SMKR1	0.560077	4.85748	2.62312	0.00953087	0.129	-2.67536
F12	0.560716	5.38981	2.56584	0.011184	0.139197	-2.85251
LINC02257	0.561566	3.89302	3.55137	0.000499904	0.0298049	-0.256949
MIR548AM	0.562451	3.77399	3.67056	0.000326618	0.0234517	0.116238
MIR6775	0.563014	3.7656	3.32926	0.0010745	0.0439837	-0.92397
TRDV1	0.564327	4.17044	2.74866	0.00665186	0.108357	-2.39261
CDC37L1-DT	0.565654	4.66187	3.79264	0.000208956	0.0192866	0.370647
RNA5SP18	0.566108	4.17213	2.38682	0.0181286	0.176493	-3.17442
IBSP	0.566606	4.2549	2.4376	0.0158488	0.165414	-3.06577
ETNPPL	0.567842	3.60502	2.77645	0.00613253	0.103951	-2.70479
MTFP1	0.568748	5.464	4.48275	1.37e-05	0.00449622	2.86135
LGR6	0.568993	4.93899	2.01606	0.0454188	0.267355	-3.88019
IFNG	0.572774	4.25968	2.85909	0.00479829	0.0913795	-2.13513
RNU6-944P	0.572805	3.83417	3.70032	0.000293213	0.0222918	0.20852
CPNE7	0.573318	5.16653	2.59753	0.0102401	0.133515	-2.75215
EPGN	0.577354	3.63711	2.42207	0.0165173	0.168729	-3.48369
MIR203A	0.580151	3.65673	3.43934	0.000738761	0.0361123	-0.703292
CPB1	0.583826	3.58916	3.65285	0.000348169	0.0243871	-0.172835
HLA-Z	0.588636	3.85355	3.63234	0.000374806	0.0255415	-0.00519592
SPP1	0.589054	6.63263	3.34694	0.00101237	0.0429778	-1.12485
MYO16-AS1	0.589382	3.75908	3.7314	0.000261785	0.0212828	0.307952
TRAJ44	0.589661	3.90565	3.00328	0.00308779	0.0737487	-1.78482
LRRC15	0.590994	4.99746	2.32644	0.0212132	0.189425	-3.30825
TFR2	0.591512	4.93892	2.72758	0.0070721	0.111644	-2.44272
TFAP2A	0.593339	5.41052	2.62645	0.00944182	0.128555	-2.71768
CLTRN	0.593356	4.45967	3.62003	0.00039171	0.0261706	-0.144762
A2ML1	0.597389	3.91891	2.24367	0.0261863	0.209879	-3.51122
LINC00239	0.600659	4.99898	3.89615	0.000141888	0.0160468	0.750747
CCL7	0.603548	4.18934	2.66338	0.00850431	0.122496	-2.58567
IGFL2	0.609938	4.13775	2.95328	0.0036044	0.0799609	-1.90544
PGA4	0.614779	3.4891	3.11437	0.00217459	0.0616959	-2.18031
TMPRSS11B	0.618269	3.60037	2.3011	0.0226393	0.195202	-3.87068
TNNI3	0.618588	4.3968	2.34256	0.0203476	0.185656	-3.25173
PAX8-AS1	0.618997	4.9328	3.12743	0.00208552	0.060459	-1.4644
PCP2	0.619537	4.30473	3.94608	0.000117403	0.0144174	0.84497
WNT7B	0.621349	4.79369	2.07207	0.0398177	0.252198	-3.76582
ZNF683	0.623812	4.69742	2.72293	0.00716791	0.112473	-2.45022
MIR6724-4	0.624006	3.68306	2.66458	0.00847513	0.122351	-2.804
SNORD51	0.626046	3.84625	3.68432	0.000310753	0.0229798	0.158369
CCL8	0.630222	5.02408	2.70881	0.00746645	0.115106	-2.48911
WNT10A	0.633728	5.20657	2.32076	0.0215259	0.19045	-3.3475
KREMEN2	0.634547	4.50252	3.24198	0.00143682	0.0508495	-1.18486
MIR7111	0.638555	4.85314	3.02571	0.00287897	0.0709314	-1.7269
CXCL11	0.6445	5.62912	2.65506	0.00870791	0.123906	-2.69042
PDILT	0.64552	3.61642	2.53963	0.0120229	0.144858	-3.27552
PLPP4	0.650525	4.48006	2.60016	0.0101651	0.132949	-2.7207
CWH43	0.650901	3.65576	2.22547	0.0274077	0.214673	-3.85401
SYT8	0.660228	5.00933	2.24527	0.0260819	0.209453	-3.46913
SERPINB13	0.660512	3.60306	2.57172	0.0110032	0.138025	-3.23897
CCDC78	0.662692	4.28508	4.63994	7.07e-06	0.00313851	3.15504
TRAJ19	0.668399	4.36315	2.35724	0.0195867	0.18285	-3.22368
KLHDC7B	0.669143	5.02826	3.19448	0.00167891	0.0545025	-1.28354
HAGHL	0.672501	4.97341	3.94061	0.000119873	0.0145029	0.885165
MAPK15	0.675189	5.04157	3.09509	0.00231262	0.0635954	-1.54418
ZBED2	0.676195	4.34262	3.69468	0.000299285	0.022565	0.0815827
FAM83C	0.680654	3.65303	2.67509	0.00822497	0.121027	-2.84485
RTL1	0.683843	3.59985	2.77752	0.00611324	0.103809	-2.73333
FAM81A	0.687424	5.02955	3.8815	0.000149946	0.0165015	0.711556
MIR210HG	0.687993	4.94158	3.70414	0.000289168	0.0221822	0.150611
IL36RN	0.690443	3.58972	3.82643	0.000184309	0.0181068	0.416814
SYNGR3	0.693279	4.83866	3.361	0.000965389	0.0418623	-0.847676
C6orf223	0.703632	4.99588	2.48813	0.0138365	0.155378	-2.9753
S100A2	0.705285	5.30068	2.62592	0.00945599	0.128588	-2.70294
FBXL16	0.71049	5.04211	3.20681	0.00161266	0.0535151	-1.24993
HLA-DQB1-AS1	0.723446	5.13954	3.29574	0.00120218	0.0467942	-1.00337
MIR6510	0.726389	3.54976	4.18808	4.57e-05	0.00849704	1.63542
MIR205HG	0.731599	3.62595	2.72336	0.00715896	0.112473	-2.79559
HCG22	0.746519	3.61086	3.32903	0.00107532	0.043986	-1.1397
SLCO1B3	0.747085	3.95349	3.25604	0.00137164	0.0499487	-1.10948
C5orf46	0.752508	4.01768	3.78944	0.000211446	0.0194537	0.440397
TNNI2	0.79914	4.68904	3.71563	0.000277308	0.0216257	0.149233
CALB2	0.814739	4.5137	3.20789	0.00160699	0.0534973	-1.27127
RHOV	0.826159	5.41766	3.10797	0.00221955	0.0622933	-1.51574
RNU6-403P	0.842475	4.19335	3.45455	0.000700988	0.0353123	-0.585445
TNNT1	0.843597	4.6448	2.83458	0.00516345	0.095564	-2.19339
TNFSF9	0.865999	5.35653	3.60083	0.000419498	0.026943	-0.106934
EPYC	0.911137	3.94718	4.10088	6.45e-05	0.0102018	1.48815
COL11A1	1.02265	4.94142	3.22697	0.00150954	0.0519304	-1.20113
